# Supplementary material for: Metal-free oxidative carbonylation on enaminone CC bond for the cascade synthesis of benzothiazole-containing vicinal diketones
Source: Royal Society of Chemistry journal article supplement (doi:10.1039/c5gc01821h), 2015-08-25

## **Metal-free oxidative carbonylation on enaminone C=C bond for the cascade synthesis of benzothiazole-containing vicinal diketones**

Jie-Ping Wan,<sup>\*,a</sup> Youyi Zhou,<sup>a</sup> Yunyun Liu<sup>a</sup> and Shouri Sheng<sup>\*,a</sup>

<sup>a</sup>College of Chemistry and Chemical Engineering, Jiangxi Normal University,  
Nanchang 330022, P.R. China

**Email:** wanjieping@jxnu.edu.cn; shengsr@jxnu.edu.cn

### **Contents**

|                                                                         |         |
|-------------------------------------------------------------------------|---------|
| General information.....                                                | S1      |
| General procedure for the synthesis of vicinal diketone.....            | S2      |
| Optimization data for the synthesis of 2-arylbzothiazole.....           | S3      |
| General procedure procedure for the synthesis of 2-arylbzothiazole..... | S3-S4   |
| Characterization data of all products.....                              | S4-S12  |
| References.....                                                         | S12     |
| <sup>1</sup> H and <sup>13</sup> C NMR spectra of all products.....     | S13-S36 |
| X-ray crystal structure of.....                                         | S37     |

### **General information**

Enaminones **1** were synthesized following literature process,<sup>1</sup> all other chemicals and solvents were obtained from commercial source and used directly without further treatment. Unless otherwise specified, all reaction were performed under air atmosphere. The <sup>1</sup>H and <sup>13</sup>C NMR were recorded in an 400 MHz apparatus by using CDCl<sub>3</sub> as solvent. The chemical shift was reported in ppm with TMS as internal standard (0 ppm). HRMS data were tested under ESI model in the spectrometer equipped TOF analyzer, and the melting points were measured in a X-4A apparatus without correcting the temperature.

### **General procedure for the synthesis of vicinal diketones**

In a 25 mL round-bottom flask equipped with a stirring bar were located enaminone **1** (0.3 mmol), *o*-aminothiophenol **2** (0.3 mmol), I<sub>2</sub> (0.06mmol) and DMSO (2 mL). The resulting mixture was then stirred at 110 °C for 12 h under air atmosphere. Upon completion of the reaction (TCL), water (5 mL) was added to the vessel and the suspension was extracted with ethyl acetate (3 × 10 mL). The combined organic solution was dried over anhydrous Na<sub>2</sub>SO<sub>4</sub>. After filtration, the organic solvent was removed from the solution under reduced pressure. The resulting residue was then subjected to silica gel chromatography to give pure product by using mixed ethyl acetate/petroleum ether as eluent (v/v = 1/15).

### Optimization data for the synthesis of 2-arylbenzothiazole (Table 1)

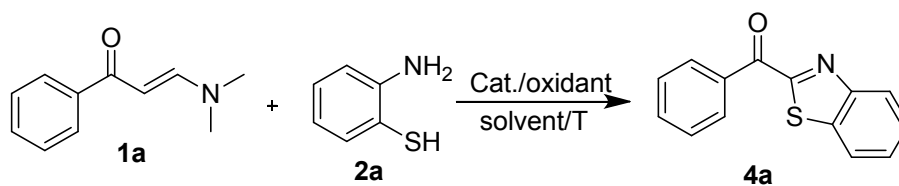

| Entry                 | Catalyst             | Oxidant               | Solvent            | T( °C )    | Yield(%) <sup>b</sup> |
|-----------------------|----------------------|-----------------------|--------------------|------------|-----------------------|
| 1                     | FeCl <sub>3</sub>    | -                     | DMSO               | 120        | 27                    |
| 2                     | <i>p</i> -TSA        | -                     | DMSO               | 120        | 19                    |
| 3                     | CAN                  | -                     | DMSO               | 120        | trace                 |
| 4                     | Rose Bengal          | -                     | DMSO               | 120        | nr                    |
| 5                     | CuI                  | -                     | DMSO               | 120        | 33                    |
| 6                     | CuI                  | TBHP                  | DMSO               | 120        | 42                    |
| 7                     | CuI                  | KMnO <sub>4</sub>     | DMSO               | 120        | nr                    |
| 8                     | CuI                  | PhI(AcO) <sub>2</sub> | DMSO               | 120        | trace                 |
| 9                     | CuI                  | MnO <sub>2</sub>      | DMSO               | 120        | nr                    |
| 10                    | CuI                  | DDQ                   | DMSO               | 120        | trace                 |
| 11 <sup>c</sup>       | CuI                  | TBHP                  | DMSO               | 120        | 52                    |
| 12 <sup>d</sup>       | CuI                  | TBHP                  | DMSO               | 120        | 46                    |
| <b>13<sup>c</sup></b> | <b>CuI</b>           | <b>TBHP</b>           | <b>DMSO</b>        | <b>110</b> | <b>54</b>             |
| 14 <sup>c</sup>       | CuI                  | TBHP                  | DMSO               | 100        | 48                    |
| 15 <sup>c,e</sup>     | CuI                  | TBHP                  | DMSO               | 110        | 39                    |
| 16 <sup>c,f</sup>     | CuI                  | TBHP                  | DMSO               | 110        | 47                    |
| 17 <sup>c</sup>       | CuBr                 | TBHP                  | DMSO               | 110        | 51                    |
| 18 <sup>c</sup>       | CuCl                 | TBHP                  | DMSO               | 110        | 43                    |
| 19 <sup>c</sup>       | CuBr <sub>2</sub>    | TBHP                  | DMSO               | 110        | 37                    |
| 20 <sup>c</sup>       | Cu(AcO) <sub>2</sub> | TBHP                  | DMSO               | 110        | 36                    |
| 21 <sup>c,g</sup>     | CuI                  | TBHP                  | DMF                | 110        | 21                    |
| 22 <sup>c,g</sup>     | CuI                  | TBHP                  | Toluene            | 110        | trace                 |
| 23 <sup>c,g</sup>     | CuI                  | TBHP                  | EtOH               | 110        | nr                    |
| 24 <sup>c,g</sup>     | CuI                  | TBHP                  | CH <sub>3</sub> CN | 110        | nr                    |

[a] Unless otherwise specified, the reaction conditions are: **1a** (0.3 mmol), **2a** (0.3 mmol), catalyst (0.06 mmol) and oxidant (0.6 mmol) in 2 mL of solvent(s), stirred for 12 h at air atmosphere. [b] Yield of isolated product. [c] The TBHP was 0.45 mmol. [d] The TBHP was 0.3 mmol. [e] The CuI was 0.03 mmol. [f] The CuI was 0.09 mol. [g] The reactions were run at reflux.

### General procedure for the synthesis of 2-arylbenzothiazole

In a 25 mL round-bottom flask equipped with a stirring bar were added enaminone **1** (0.3 mmol), *o*-aminothiophenol **2** (0.3 mmol), CuI (0.06mmol), TBHP (0.45 mmol) and DMSO (2 mL). The resulting mixture was stirred at 110 °C for 12 h under air atmosphere. Upon completion of the reaction (TCL), the water (5 mL) was added to

the vessel and the resulting suspension was extracted with ethyl acetate (3×10 mL). The combined organic solution was dried over anhydrous Na<sub>2</sub>SO<sub>4</sub>. After filtration, the organic solvent was removed from the solution under reduced pressure. The retained residue was then subjected to silica gel chromatography to give pure product by using mixed ethyl acetate/petroleum ether as eluent (v/v = 1/50).

### Characterization data of all products

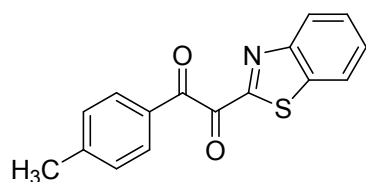

**1-Benzothiazol-2-yl-2-p-tolyl-ethane-1,2-dione (3a).** Orange solid; m.p. 173-175 °C; <sup>1</sup>H NMR (400 MHz, CDCl<sub>3</sub>) δ 8.19-8.16 (m, 1 H), 8.04-8.01 (m, 1 H), 7.91 (d, *J* = 8.0 Hz, 2 H), 7.58-7.56 (m, 2 H), 7.33 (d, *J* = 8.0 Hz, 2 H), 2.44 (s, 3 H); <sup>13</sup>C NMR (100 MHz, CDCl<sub>3</sub>) δ 191.8, 188.0, 162.9, 153.8, 146.6, 137.3, 130.2, 130.0, 129.8, 128.6, 127.4, 126.3, 122.4, 22.0; ESI-HRMS: Calcd for C<sub>16</sub>H<sub>12</sub>NO<sub>2</sub>S [M+H]<sup>+</sup>: 282.0589; Found: 282.0589.

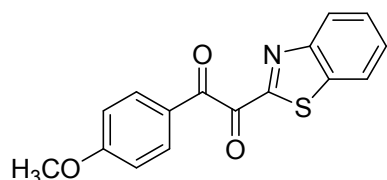

**1-Benzothiazol-2-yl-2-(4-methoxy-phenyl)-ethane-1,2-dione (3b).** Orange solid; m.p. 186-188 °C; <sup>1</sup>H NMR (400 MHz, CDCl<sub>3</sub>) δ 8.19-8.17 (m, 1 H), 8.03-8.00 (m, 2 H), 7.99 (d, *J* = 7.2 Hz, 1 H), 7.58-7.55 (m, 2 H), 6.99 (d, *J* = 8.4 Hz, 2 H), 3.89 (s, 3 H); <sup>13</sup>C NMR (100 MHz, CDCl<sub>3</sub>) δ 190.5, 187.9, 165.3, 162.9, 153.8, 137.0, 132.6, 128.6, 127.4, 126.3, 125.4, 122.4, 114.5, 55.7; ESI-HRMS: Calcd for C<sub>16</sub>H<sub>12</sub>NO<sub>3</sub>S [M+H]<sup>+</sup>: 298.0538; Found: 298.0545.

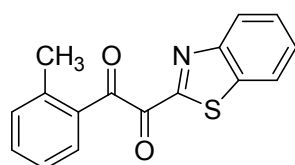

**1-Benzothiazol-2-yl-2-o-tolyl-ethane-1,2-dione (3c).** Yellow solid; m.p. 118-121 °C; <sup>1</sup>H NMR (400 MHz, CDCl<sub>3</sub>) δ 8.18-8.15 (m, 1 H), 8.03-8.01 (m, 1 H), 7.69 (d, *J* = 8.0

Hz, 1 H), 7.58-7.55 (m, 2 H), 7.50 (t,  $J = 8.0$  Hz, 1 H), 7.36 (d,  $J = 7.6$  Hz, 1 H), 7.29 (d,  $J = 7.2$  Hz, 1 H), 2.76 (s, 3 H);  $^{13}\text{C}$  NMR (150 MHz,  $\text{CDCl}_3$ )  $\delta$  194.1, 187.9, 163.0, 153.8, 141.8, 137.0, 134.0, 133.1, 132.6, 131.1, 128.6, 127.4, 126.3, 126.0, 122.4, 21.9; ESI-HRMS: Calcd for  $\text{C}_{16}\text{H}_{12}\text{NO}_2\text{S}$   $[\text{M}+\text{H}]^+$ : 282.0589; Found: 282.0582.

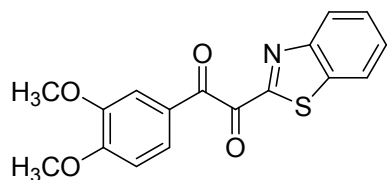

**1-Benzothiazol-2-yl-2-(3,4-dimethoxy-phenyl)-ethane-1,2-dione (3d).** Green solid; m.p. 127-129 °C;  $^1\text{H}$  NMR (600 MHz,  $\text{CDCl}_3$ )  $\delta$  8.20-8.19 (m, 1 H), 8.04-8.03 (m, 1 H), 7.67 (s, 1 H), 7.59-7.57 (m, 2 H), 7.52 (dd,  $J_1 = 8.4$  Hz,  $J_2 = 1.8$  Hz, 1 H), 6.91 (d,  $J = 8.4$  Hz, 1 H), 3.98 (s, 3 H), 3.96 (s, 3 H);  $^{13}\text{C}$  NMR (150 MHz,  $\text{CDCl}_3$ )  $\delta$  190.6, 187.7, 163.0, 155.3, 153.8, 149.8, 137.0, 128.6, 127.4, 126.6, 126.3, 125.6, 122.4, 110.4, 110.3, 56.3, 56.1; ESI-HRMS: Calcd for  $\text{C}_{17}\text{H}_{14}\text{NO}_4\text{S}$   $[\text{M}+\text{H}]^+$ : 328.0644; Found: 328.0637.

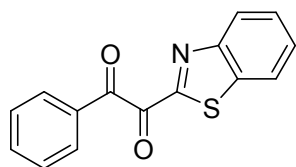

**1-Benzothiazol-2-yl-2-phenyl-ethane-1,2-dione (3e).** Yellow solid; m.p. 144-145 °C;  $^1\text{H}$  NMR (400 MHz,  $\text{CDCl}_3$ )  $\delta$  8.19-8.16 (m, 1 H), 8.03 (t,  $J = 7.2$  Hz, 3 H), 7.68 (t,  $J = 7.2$  Hz, 1 H), 7.59-7.52 (m, 4 H);  $^{13}\text{C}$  NMR (100 MHz,  $\text{CDCl}_3$ )  $\delta$  192.0, 187.8, 162.7, 153.8, 137.1, 135.0, 132.5, 130.0, 129.0, 128.6, 127.4, 126.3, 122.4; ESI-HRMS: Calcd for  $\text{C}_{15}\text{H}_{10}\text{NO}_2\text{S}$   $[\text{M}+\text{H}]^+$ : 268.0427; Found: 268.0427.

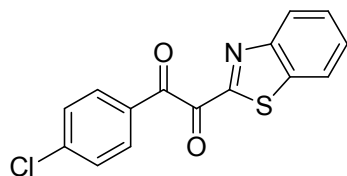

**1-Benzothiazol-2-yl-2-(4-chloro-phenyl)-ethane-1,2-dione (3f).** Yellow solid; m.p. 208-210 °C;  $^1\text{H}$  NMR (600 MHz,  $\text{CDCl}_3$ )  $\delta$  8.19-8.18 (m, 1 H), 8.05-8.04 (m, 1 H), 7.96 (d,  $J = 8.4$  Hz, 2 H), 7.60-7.59 (m, 2 H), 7.52 (d,  $J = 8.4$  Hz, 2 H);  $^{13}\text{C}$  NMR (150 MHz,  $\text{CDCl}_3$ )  $\delta$  190.8, 187.4, 162.5, 153.8, 141.9, 137.0, 131.3, 130.8, 129.5, 128.8,

127.5, 126.4, 122.5; ESI-HRMS: Calcd for C<sub>15</sub>H<sub>9</sub>ClNO<sub>2</sub>S [M+H]<sup>+</sup>: 302.0037; Found: 302.0047.

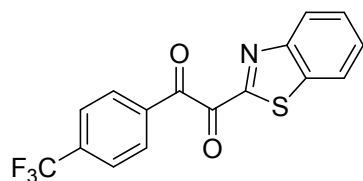

**1-Benzothiazol-2-yl-2-(4-trifluoromethyl-phenyl)-ethane-1,2-dione (3g).** Orange solid; m.p. 157-159 °C; <sup>1</sup>H NMR (400 MHz, CDCl<sub>3</sub>) δ 8.18-8.13 (m, 3 H), 8.05 (t, *J* = 4.4 Hz, 1 H), 7.81 (d, *J* = 8.0 Hz, 2 H), 7.60 (d, *J* = 4.0 Hz, 2 H); <sup>13</sup>C NMR (100 MHz, CDCl<sub>3</sub>) δ 191.0, 187.0, 162.2, 153.7, 137.1, 136.3, 135.9, 135.0, 130.3, 129.0, 127.6, 126.4, 126.1 (t, *J* = 3.6 Hz), 122.5; ESI-HRMS: Calcd for C<sub>16</sub>H<sub>9</sub>F<sub>3</sub>NO<sub>2</sub>S [M+H]<sup>+</sup>: 336.0301; Found: 336.0310.

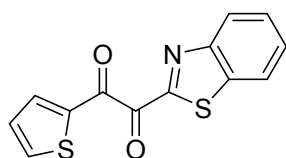

**1-Benzothiazol-2-yl-2-thiophen-2-yl-ethane-1,2-dione (3h).** Brown solid; m.p. 100-102 °C; <sup>1</sup>H NMR (600 MHz, CDCl<sub>3</sub>) δ 8.25-8.23 (m, 1 H), 8.04-8.02 (m, 1 H), 7.90-7.88 (m, 2 H), 7.60-7.58 (m, 2 H), 7.21 (t, *J* = 4.2 Hz, 1 H); <sup>13</sup>C NMR (150 MHz, CDCl<sub>3</sub>) δ 184.8, 182.9, 161.7, 153.7, 139.0, 137.5, 137.3, 137.1, 128.9, 128.7, 127.5, 126.4, 122.4; ESI-HRMS: Calcd for C<sub>13</sub>H<sub>8</sub>NO<sub>2</sub>S<sub>2</sub> [M+H]<sup>+</sup>: 273.9991; Found: 273.9989.

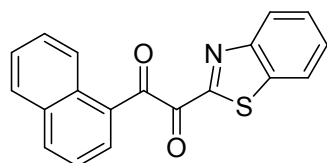

**1-Benzothiazol-2-yl-2-naphthalen-1-yl-ethane-1,2-dione (3i).** Green solid; m.p. 168-170 °C; <sup>1</sup>H NMR (600 MHz, CDCl<sub>3</sub>) δ 9.37 (d, *J* = 8.4 Hz, 1 H), 8.14 (d, *J* = 7.8 Hz, 2 H), 8.05 (d, *J* = 1.8 Hz, 1 H), 8.04-7.94 (m, 2 H), 7.79-7.76 (m, 1 H), 7.65 (t, *J* = 7.2 Hz, 1 H), 7.58-7.55 (m, 2 H), 7.51 (t, *J* = 7.8 Hz, 1 H); <sup>13</sup>C NMR (150 MHz, CDCl<sub>3</sub>) δ 194.3, 187.6, 163.3, 153.9, 137.1, 136.3, 135.3, 134.1, 131.1, 129.6, 128.7, 128.6, 127.9, 127.4, 127.2, 126.3, 126.2, 124.4, 122.4; ESI-HRMS: Calcd for C<sub>19</sub>H<sub>12</sub>NO<sub>2</sub>S [M+H]<sup>+</sup>: 318.0589; Found: 318.0588.

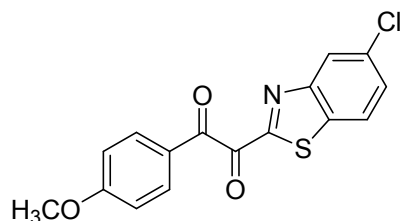

**1-(5-Chloro-benzothiazol-2-yl)-2-(4-methoxy-phenyl)-ethane-1,2-dione (3j).**

Orange solid; m.p. 186-187 °C; <sup>1</sup>H NMR (600 MHz, CDCl<sub>3</sub>) δ 8.17 (s, 1 H), 7.98 (d, *J* = 9.0 Hz, 2 H), 7.95 (d, *J* = 9.0 Hz, 1 H), 7.55-7.54 (m, 1 H), 7.01 (d, *J* = 9.0 Hz, 2 H), 3.90 (s, 1 H); <sup>13</sup>C NMR (150 MHz, CDCl<sub>3</sub>) δ 190.1, 187.4, 165.4, 164.6, 154.5, 135.2, 133.6, 132.6, 129.2, 125.7, 125.3, 123.2, 114.6, 55.7; ESI-HRMS: Calcd for C<sub>16</sub>H<sub>11</sub>ClNO<sub>3</sub>S [M+H]<sup>+</sup>: 332.0148; Found: 332.0140.

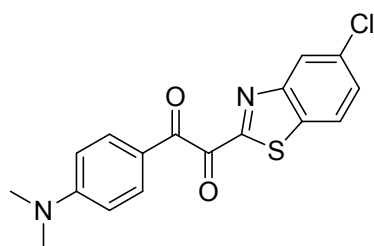

**1-(5-Chloro-benzothiazol-2-yl)-2-(4-dimethylamino-phenyl)-ethane-1,2-dione (3k).**

Orange solid; m.p. 154-156 °C; <sup>1</sup>H NMR (600 MHz, CDCl<sub>3</sub>) δ 8.17 (d, *J* = 1.2 Hz, 1 H), 7.93 (d, *J* = 9.0 Hz, 1 H), 7.89 (d, *J* = 8.4 Hz, 2 H), 7.53-7.51 (m, 1 H), 6.69 (d, *J* = 9.0 Hz, 2 H), 3.11 (s, 6 H); <sup>13</sup>C NMR (150 MHz, CDCl<sub>3</sub>) δ 189.0, 187.8, 165.2, 154.8, 154.5, 135.2, 133.4, 132.6, 128.9, 125.7, 123.1, 120.0, 111.1, 40.1; ESI-HRMS: Calcd for C<sub>17</sub>H<sub>14</sub>ClN<sub>2</sub>O<sub>2</sub>S [M+H]<sup>+</sup>: 345.0464; Found: 345.0463.

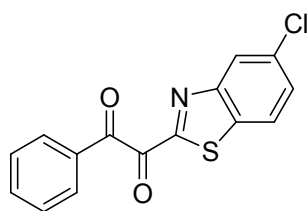

**1-(5-Chloro-benzothiazol-2-yl)-2-phenyl-ethane-1,2-dione (3l).**

Reseda solid; m.p. 77-79 °C; <sup>1</sup>H NMR (600 MHz, CDCl<sub>3</sub>) δ 8.17 (s, 1 H), 8.01 (d, *J* = 7.2 Hz, 2 H), 7.96 (d, *J* = 8.4 Hz, 1 H), 7.70 (t, *J* = 7.8 Hz, 1 H), 7.57-7.54 (m, 3 H); <sup>13</sup>C NMR (150 MHz, CDCl<sub>3</sub>) δ 191.8, 187.4, 164.3, 154.4, 135.3, 135.2, 133.7, 132.3, 130.0, 129.3, 129.1, 125.7, 123.2; ESI-HRMS: Calcd for C<sub>15</sub>H<sub>9</sub>ClNO<sub>2</sub>S [M+H]<sup>+</sup>: 302.0043; Found: 302.0074.

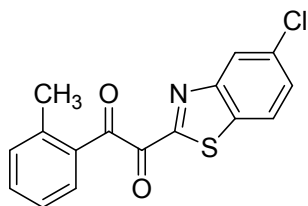

**1-(5-Chloro-benzothiazol-2-yl)-2-o-tolyl-ethane-1,2-dione (3m).** Yellow solid; m.p. 139-141 °C;  $^1\text{H}$  NMR (600 MHz,  $\text{CDCl}_3$ )  $\delta$  8.16 (d,  $J = 2.4$  Hz, 1 H), 7.95 (d,  $J = 9.0$  Hz, 1 H), 7.55 (dd,  $J_1 = 9.0$  Hz,  $J_2 = 1.8$  Hz, 1 H), 7.52 (dd,  $J_1 = 7.8$  Hz,  $J_2 = 1.2$  Hz, 2 H), 7.38 (d,  $J = 7.8$  Hz, 1 H), 7.29 (t,  $J = 7.8$  Hz, 1 H), 2.75 (s, 3 H);  $^{13}\text{C}$  NMR (150 MHz,  $\text{CDCl}_3$ )  $\delta$  193.8, 187.4, 164.7, 154.5, 141.8, 135.2, 134.1, 133.6, 133.0, 132.7, 130.9, 129.2, 126.1, 125.7, 123.2, 21.9; ESI-HRMS: Calcd for  $\text{C}_{16}\text{H}_{10}\text{ClNO}_2\text{SNa}$   $[\text{M}+\text{Na}]^+$ : 338.0018; Found: 338.0028.

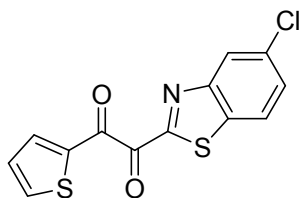

**1-(5-Chloro-benzothiazol-2-yl)-2-thiophen-2-yl-ethane-1,2-dione (3n).** Brown solid; m.p. 143-145 °C;  $^1\text{H}$  NMR (600 MHz,  $\text{CDCl}_3$ )  $\delta$  8.23 (s, 1 H), 7.96 (d,  $J = 9.0$  Hz, 1 H), 7.92-7.90 (m, 2 H), 7.56 (d,  $J = 9.0$  Hz, 1 H), 7.24-7.22 (m, 1 H);  $^{13}\text{C}$  NMR (150 MHz,  $\text{CDCl}_3$ )  $\delta$  184.2, 182.3, 163.1, 154.3, 138.7, 137.8, 137.3, 135.5, 133.7, 129.4, 129.0, 125.8, 123.2; ESI-HRMS: Calcd for  $\text{C}_{13}\text{H}_7\text{ClNO}_2\text{S}_2$   $[\text{M}+\text{H}]^+$ : 307.9607; Found: 307.9598.

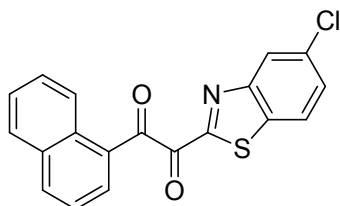

**1-(5-Chloro-benzothiazol-2-yl)-2-naphthalen-1-yl-ethane-1,2-dione (3o).** Brown solid; m.p. 92-94 °C;  $^1\text{H}$  NMR (600 MHz,  $\text{CDCl}_3$ )  $\delta$  9.34 (d,  $J = 8.4$  Hz, 1 H), 8.15 (d,  $J = 8.4$  Hz, 1 H), 8.12 (s, 1 H), 7.97-7.94 (m, 3 H), 7.78 (t,  $J = 7.2$  Hz, 1 H), 7.65 (t,  $J = 7.8$  Hz, 1 H), 7.55-7.51 (m, 2 H);  $^{13}\text{C}$  NMR (150 MHz,  $\text{CDCl}_3$ )  $\delta$  193.9, 187.1, 164.9, 154.4, 136.4, 135.3, 135.2, 134.1, 133.5, 131.0, 129.7, 129.2, 128.8, 127.7, 127.3, 126.1, 125.7, 124.4, 123.2; ESI-HRMS: Calcd for  $\text{C}_{19}\text{H}_{10}\text{ClNO}_2\text{SNa}$   $[\text{M}+\text{Na}]^+$ : 374.0018; Found: 374.0025.



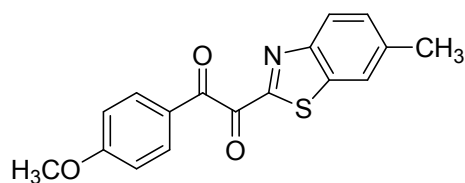

**1-(4-Methoxy-phenyl)-2-(6-methyl-benzothiazol-2-yl)-ethane-1,2-dione (3p).**

Orange solid; m.p. 119-120 °C; <sup>1</sup>H NMR (400 MHz, CDCl<sub>3</sub>) δ 8.04 (d, *J* = 8.8 Hz, 1 H), 7.98 (d, *J* = 9.2 Hz, 2 H), 7.79 (s, 1 H), 7.38-7.35 (m, 1 H), 6.98 (d, *J* = 9.2 Hz, 2 H), 3.88 (s, 3 H), 2.52 (s, 3 H); <sup>13</sup>C NMR (150 MHz, CDCl<sub>3</sub>) δ 190.6, 188.1, 165.2, 161.9, 152.1, 139.5, 137.4, 132.6, 129.4, 125.8, 125.6, 121.9, 114.4, 55.7, 21.9; ESI-HRMS: Calcd for C<sub>17</sub>H<sub>14</sub>NO<sub>3</sub>S [M+H]<sup>+</sup>: 312.0694; Found: 312.0700.

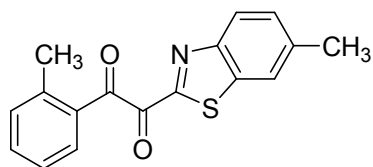

**1-(6-Methyl-benzothiazol-2-yl)-2-o-tolyl-ethane-1,2-dione (3q).** Orange solid; m.p. 115-117 °C; <sup>1</sup>H NMR (600 MHz, CDCl<sub>3</sub>) δ 8.04 (d, *J* = 8.4 Hz, 1 H), 7.81 (s, 1 H), 7.69 (d, *J* = 7.2 Hz, 1 H), 7.50 (t, *J* = 7.2 Hz, 1 H), 7.39-7.35 (m, 2 H), 7.29-7.25 (m, 1 H), 2.75 (s, 3 H), 2.53 (s, 3 H); <sup>13</sup>C NMR (150 MHz, CDCl<sub>3</sub>) δ 194.3, 188.0, 162.0, 152.1, 141.8, 139.5, 137.4, 133.9, 133.1, 132.6, 131.1, 129.4, 126.0, 125.8, 121.9, 21.9, 21.8; ESI-HRMS: Calcd for C<sub>17</sub>H<sub>14</sub>NO<sub>2</sub>S [M+H]<sup>+</sup>: 296.0745; Found: 296.0718.

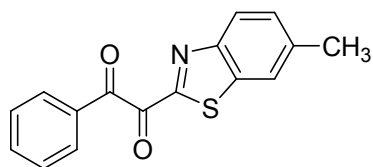

**1-(6-Methyl-benzothiazol-2-yl)-2-phenyl-ethane-1,2-dione (3r).** Orange solid; m.p. 101-103 °C; <sup>1</sup>H NMR (600 MHz, CDCl<sub>3</sub>) δ 8.05 (d, *J* = 8.4 Hz, 1 H), 8.02 (d, *J* = 7.2 Hz, 2 H), 7.81 (s, 1 H), 7.68 (t, *J* = 7.8 Hz, 1 H), 7.53 (t, *J* = 7.8 Hz, 2 H), 7.38 (t, *J* = 9.6 Hz, 1 H), 2.54 (s, 3 H); <sup>13</sup>C NMR (150 MHz, CDCl<sub>3</sub>) δ 192.3, 187.9, 161.7, 152.1, 139.7, 137.5, 135.1, 132.5, 130.1, 129.4, 129.0, 125.9, 121.9, 22.0; ESI-HRMS: Calcd for C<sub>16</sub>H<sub>12</sub>NO<sub>2</sub>S [M+H]<sup>+</sup>: 282.0589; Found: 282.0584.

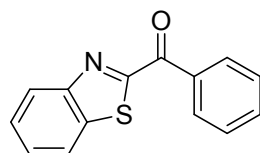

**Benzothiazol-2-yl-phenyl-methanone (4a).**<sup>2</sup> <sup>1</sup>H NMR (400 MHz, CDCl<sub>3</sub>) δ 8.55 (d, *J* = 7.6 Hz, 2 H), 8.24 (d, *J* = 8.4 Hz, 1 H), 8.01 (d, *J* = 7.6 Hz, 1 H), 7.67 (t, *J* = 7.6 Hz, 1 H), 7.61-7.53 (m, 4 H).

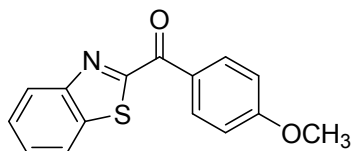

**Benzothiazol-2-yl-(4-methoxyphenyl)-methanone (4b).**<sup>2</sup> <sup>1</sup>H NMR (400 MHz, CDCl<sub>3</sub>) δ 8.65 (d, *J* = 8.8 Hz, 2 H), 8.23 (d, *J* = 8.0 Hz, 1 H), 8.02 (d, *J* = 7.6 Hz, 1 H), 7.60-7.52 (m, 2 H), 7.04 (d, *J* = 9.2 Hz, 2 H), 3.92 (s, 3 H).

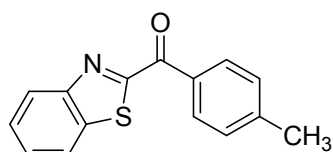

**Benzothiazol-2-yl-p-tolyl-methanone (4c).**<sup>2</sup> <sup>1</sup>H NMR (400 MHz, CDCl<sub>3</sub>) δ 8.47 (d, *J* = 8.0 Hz, 2 H), 8.22 (d, *J* = 8.0 Hz, 1 H), 7.99 (d, *J* = 8.0 Hz, 1 H), 7.58-7.50 (m, 2 H), 7.34 (d, *J* = 8.0 Hz, 2 H), 2.45 (s, 3 H).

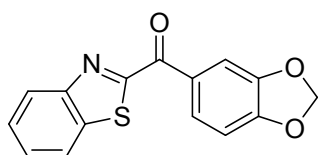

**Benzothiazol-2-yl-(1,3-dihydro-isobenzofuran-5-yl)-methanone (4d).**<sup>2</sup> <sup>1</sup>H NMR (400 MHz, CDCl<sub>3</sub>) δ 8.40 (d, *J* = 8.0 Hz, 1 H), 8.22 (d, *J* = 7.6 Hz, 1 H), 8.06 (s, 1 H), 7.99 (d, *J* = 8.0 Hz, 1 H), 7.58-7.51 (m, 2 H), 6.96 (d, *J* = 8.0 Hz, 1 H), 6.10 (s, 2H).

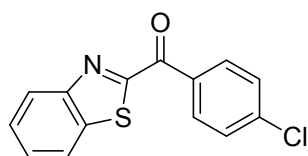

**Benzothiazol-2-yl-(4-chlorophenyl)-methanone (4e).**<sup>2</sup> <sup>1</sup>H NMR (400 MHz, CDCl<sub>3</sub>) δ 8.56 (d, *J* = 8.4 Hz, 2 H), 8.24 (d, *J* = 7.6 Hz, 1 H), 8.02 (d, *J* = 7.6 Hz, 1 H), 7.60-7.53 (m, 4 H).

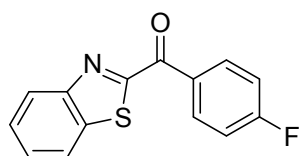

**Benzothiazol-2-yl-(4-fluorophenyl)-methanone (4f).**<sup>2</sup> <sup>1</sup>H NMR (400 MHz, CDCl<sub>3</sub>) δ 8.69-8.65 (m, 2 H), 8.23 (d, *J* = 8.0 Hz, 1 H), 8.01 (d, *J* = 7.6 Hz, 1 H), 7.61-7.53 (m, 2 H), 7.23 (t, *J* = 8.8 Hz, 2 H).

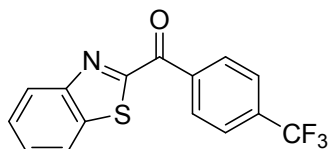

**Benzothiazol-2-yl-(4-trifluoromethyl-phenyl)-methanone (4g).** Yellow solid; m.p. 168-170 °C; <sup>1</sup>H NMR (400 MHz, CDCl<sub>3</sub>) δ 8.65 (d, *J* = 7.6 Hz, 2 H), 8.23 (d, *J* = 7.6 Hz, 1 H), 8.01 (d, *J* = 7.2 Hz, 1 H), 7.81 (d, *J* = 8.4 Hz, 2 H), 7.62-7.54 (m, 2 H); <sup>13</sup>C NMR (100 MHz, CDCl<sub>3</sub>) δ 184.5, 166.3, 153.8, 137.8, 137.1, 135.0, 134.7, 131.6, 128.0, 127.2, 125.9, 125.4 (q, *J* = 3.6 Hz), 122.2; ESI-HRMS: Calcd for C<sub>15</sub>H<sub>9</sub>F<sub>3</sub>NOS [M+H]<sup>+</sup>: 308.0351; Found: 308.0330.

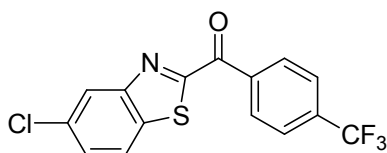

**(5-Chloro-benzothiazol-2-yl)-(4-trifluoromethyl-phenyl)-methanone (4h).** Orange solid; m.p. 119-121 °C; <sup>1</sup>H NMR (400 MHz, CDCl<sub>3</sub>) δ 8.65 (d, *J* = 8.0 Hz, 2 H), 8.23 (s, 1 H), 7.94 (d, *J* = 4.8 Hz, 1 H), 7.82 (d, *J* = 8.0 Hz, 2 H), 7.55-7.53 (m, 1 H); <sup>13</sup>C NMR (100 MHz, CDCl<sub>3</sub>) δ 184.1, 168.0, 154.5, 137.4, 135.3, 135.2, 134.9, 133.3, 131.6, 128.6, 125.5 (q, *J* = 3.6 Hz), 125.4, 123.0; ESI-HRMS: Calcd for C<sub>15</sub>H<sub>8</sub>ClF<sub>3</sub>NOS [M+H]<sup>+</sup>: 341.9962; Found: 341.9933.

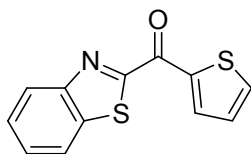

**Benzothiazol-2-yl-(thiophen-2-yl)-methanone (4i).**<sup>2</sup> <sup>1</sup>H NMR (400 MHz, CDCl<sub>3</sub>) δ 8.76 (d, *J* = 4.0 Hz, 1 H), 8.24 (d, *J* = 8.8 Hz, 1 H), 8.00 (d, *J* = 7.6 Hz, 1 H), 7.84 (d, *J* = 5.2 Hz, 1 H), 7.61-7.52 (m, 2 H), 7.26 (d, *J* = 4.0 Hz, 1 H).

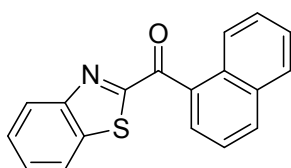

**Benzothiazol-2-yl-(naphthalen-1-yl)-methanone (4j).**<sup>2</sup> <sup>1</sup>H NMR (400 MHz, CDCl<sub>3</sub>)  
δ 8.52 (d, *J* = 8.0 Hz, 1 H), 8.35 (d, *J* = 7.6 Hz, 1 H), 8.19-8.17 (m, 1 H), 8.09 (d, *J* =  
8.0 Hz, 1 H), 8.03-8.01 (m, 1 H), 7.92 (d, *J* = 8.0 Hz, 1 H), 7.62-7.54 (m, 5 H).

## References

- [1] F. M. A. A. El-Taweel, M. H. Elnagdi, *J. Heterocyclic Chem.* 2001, **38**, 981.  
[2] Q.-H. Gao, X. Wu, F.-C. Jia, M.-C. Liu, Y.-P. Zhu, Q. Cai, A.-X. Wu, *J. Org. Chem.* **2013**, *78*, 2792.

# <sup>1</sup>H and <sup>13</sup>C NMR spectra of all products

## <sup>1</sup>H and <sup>13</sup>C NMR spectra of 3a

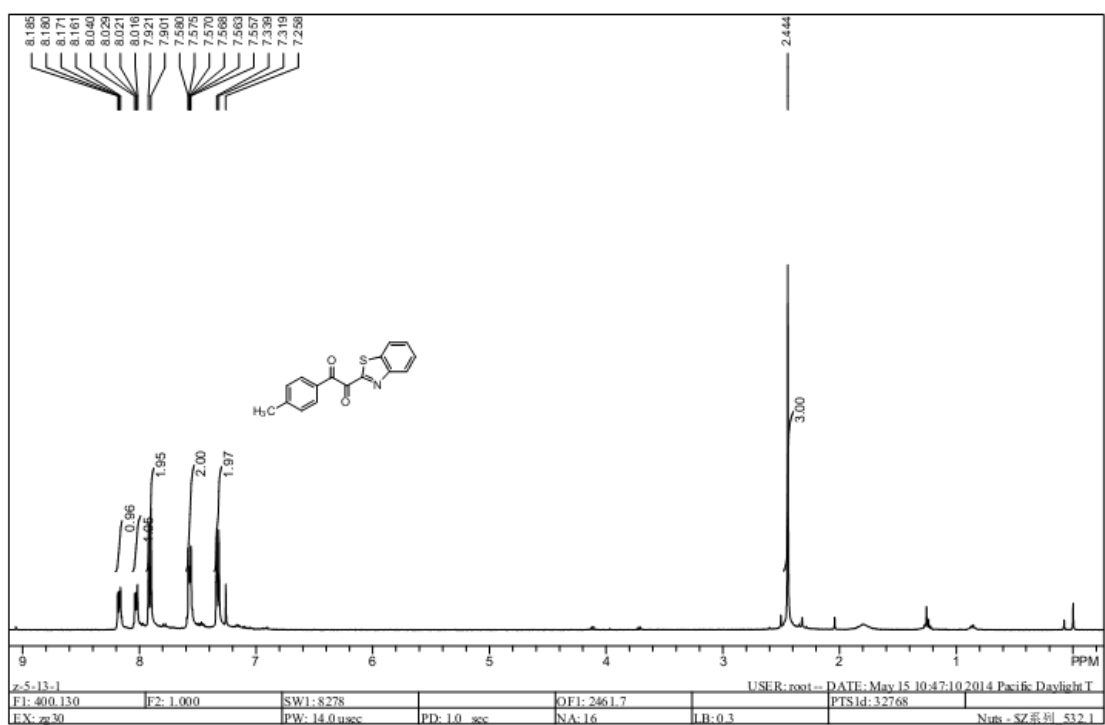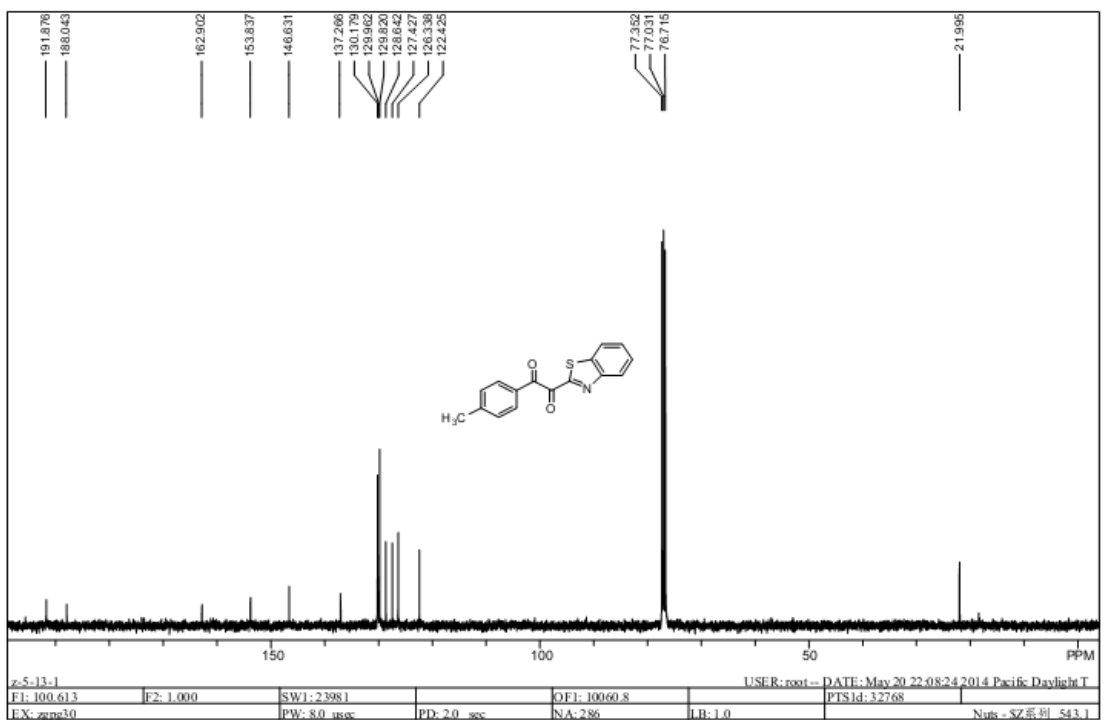

$^1\text{H}$  and  $^{13}\text{C}$  NMR spectra of **3b**

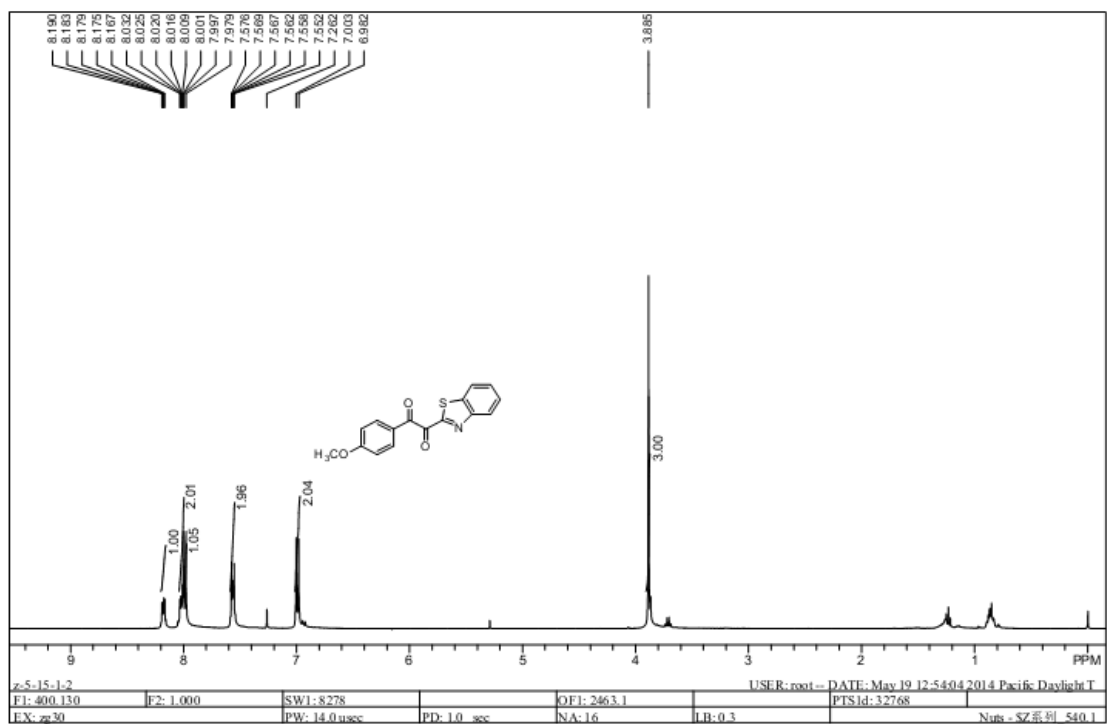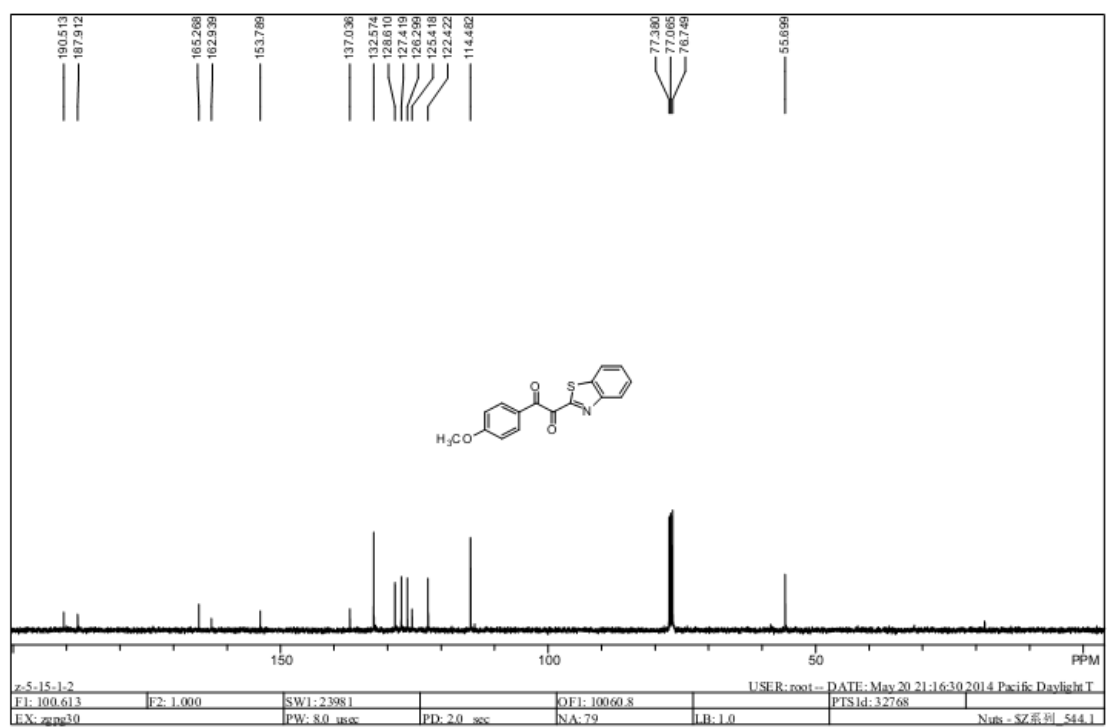

$^1\text{H}$  and  $^{13}\text{C}$  NMR spectra of **3c**

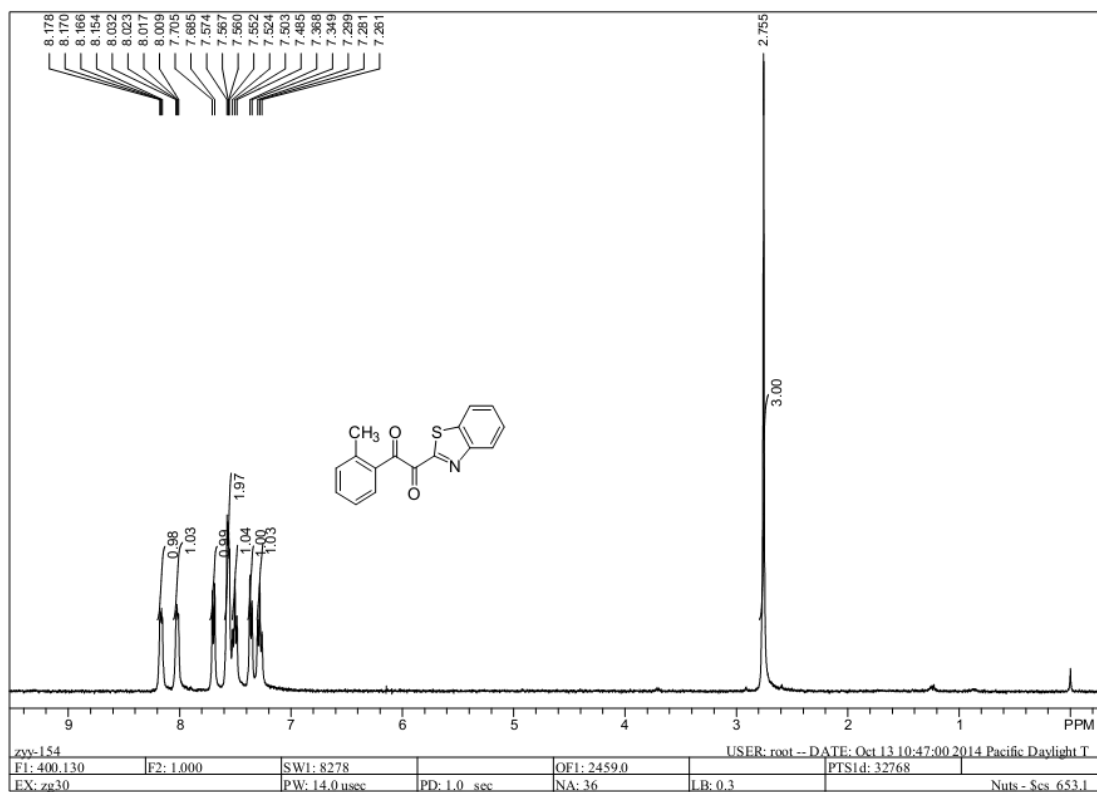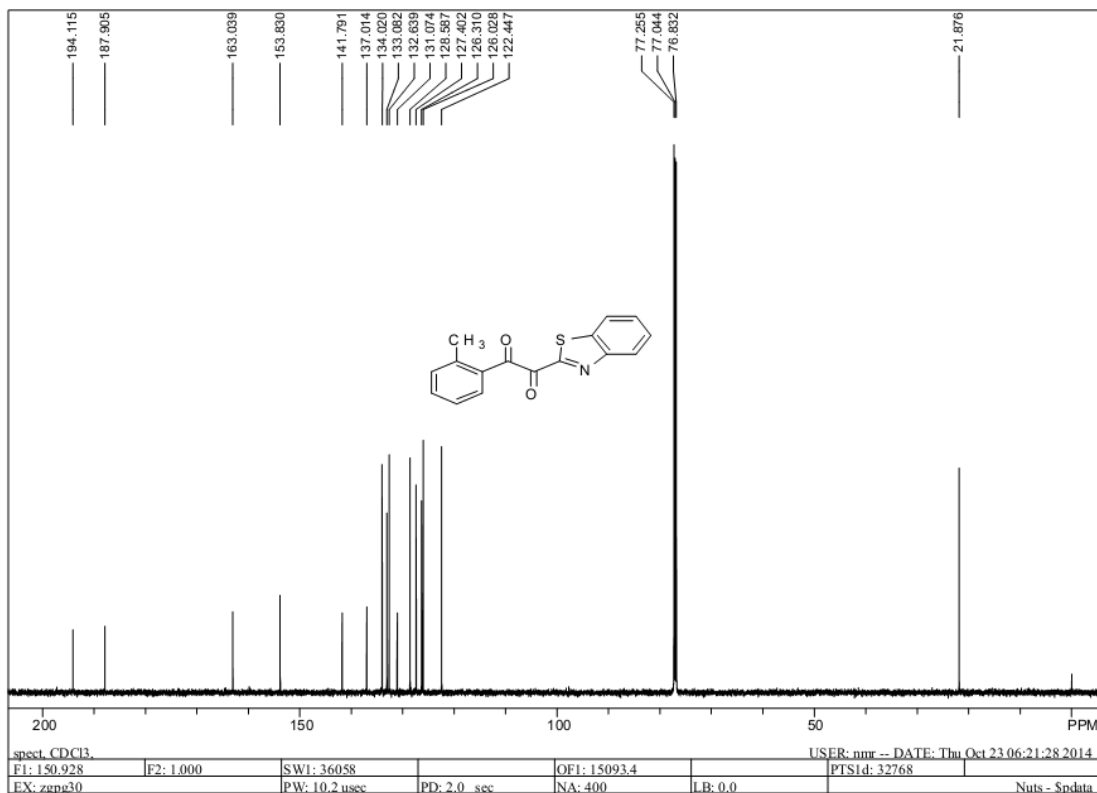

$^1\text{H}$  and  $^{13}\text{C}$  NMR spectra of **3d**

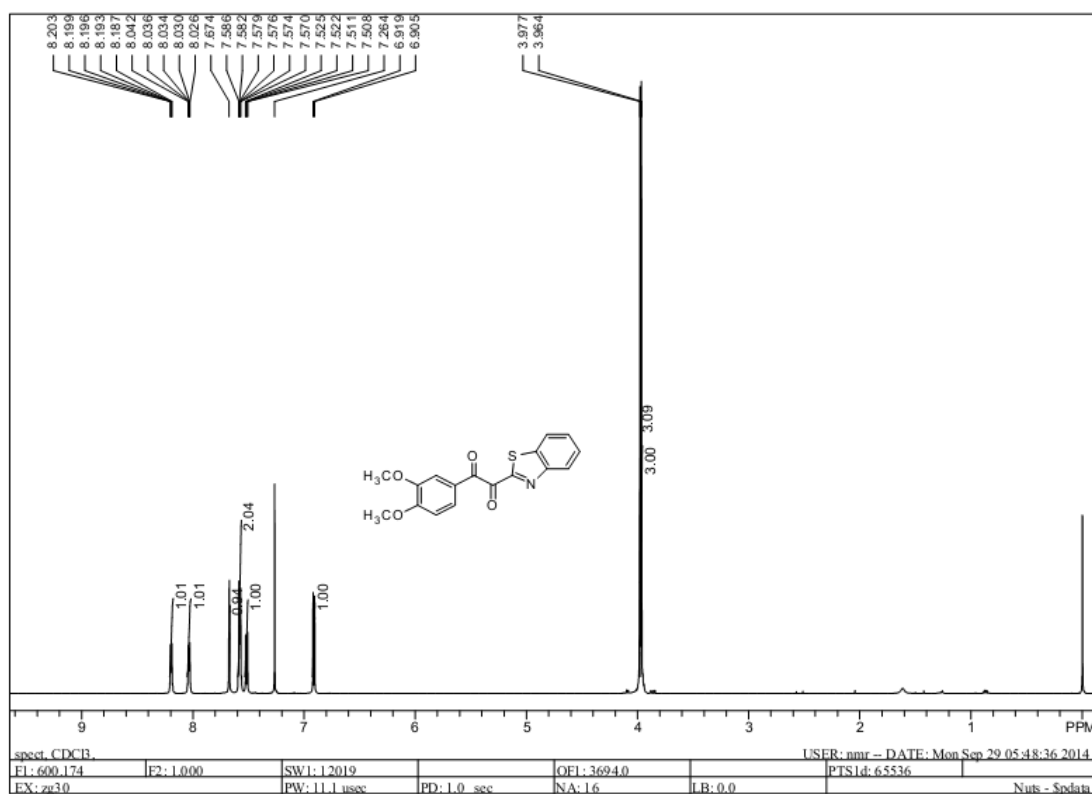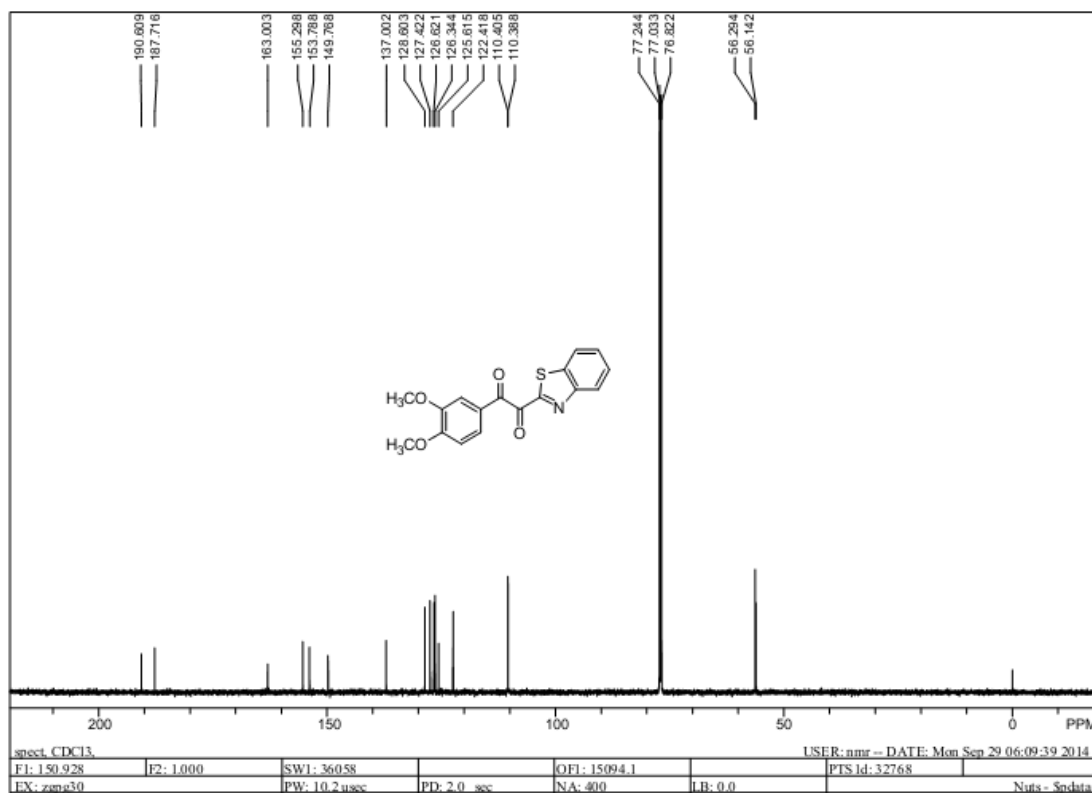



$^1\text{H}$  and  $^{13}\text{C}$  NMR spectra of **3e**

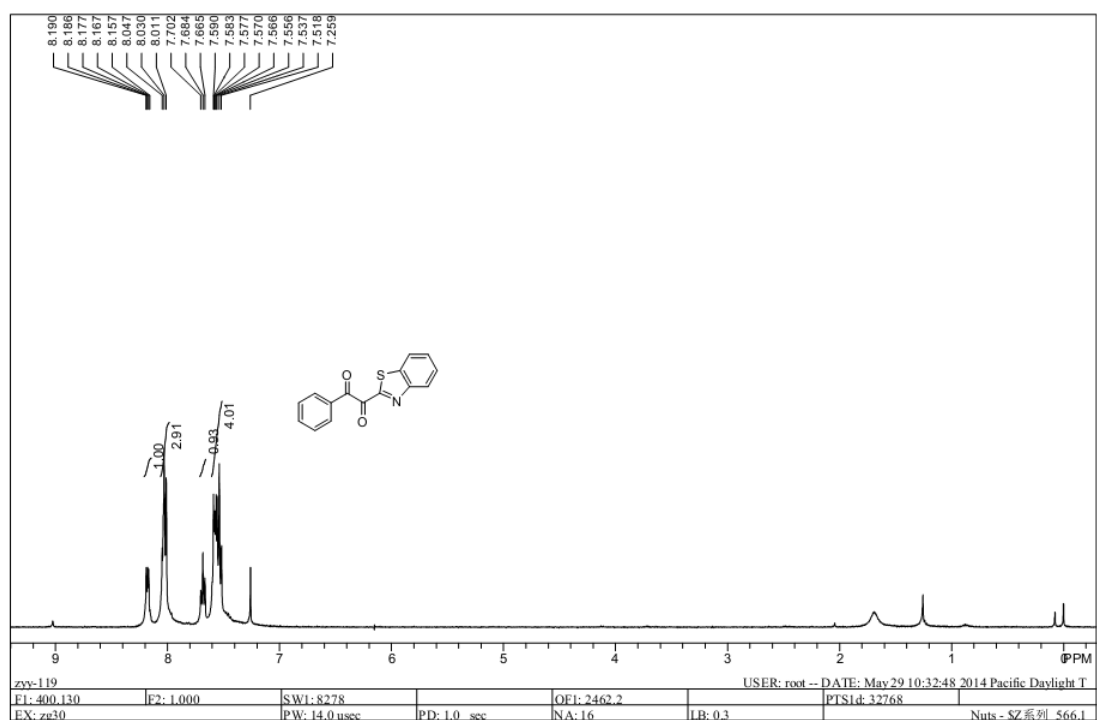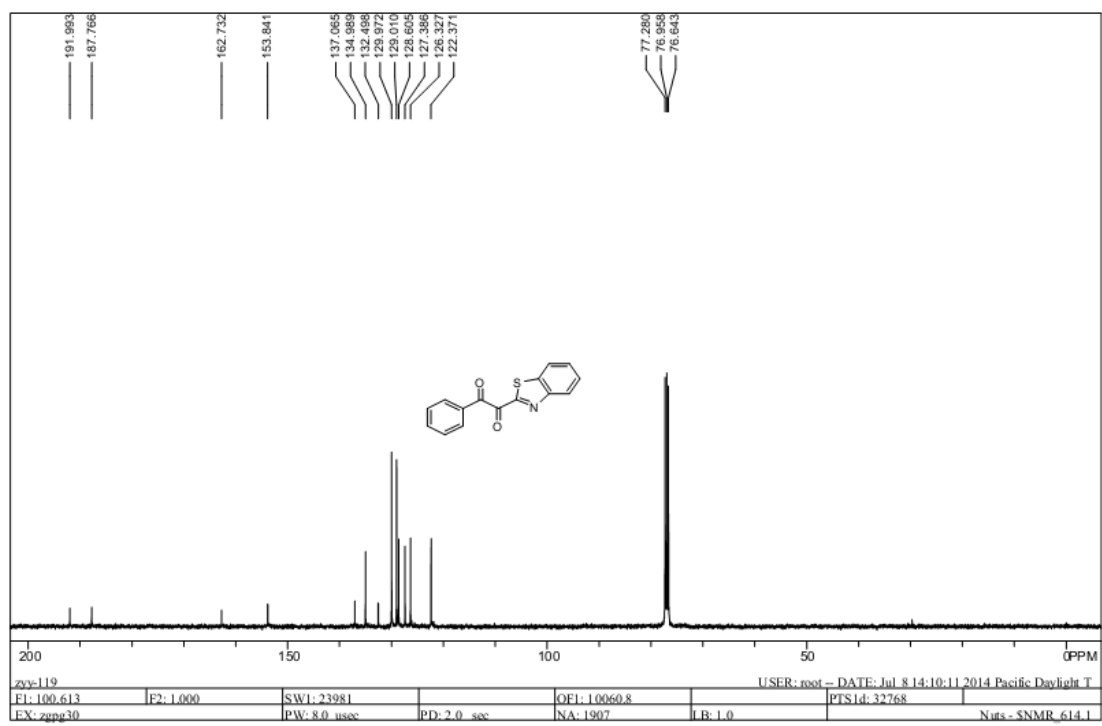

$^1\text{H}$  and  $^{13}\text{C}$  NMR spectra of **3f**

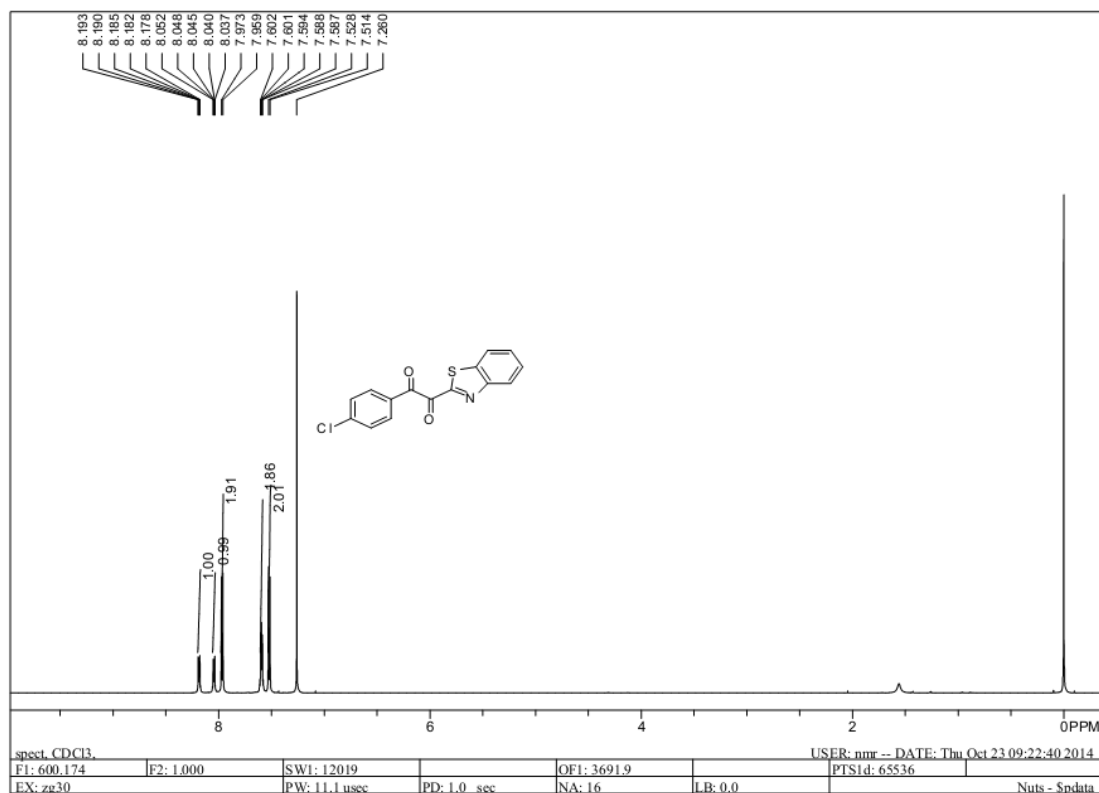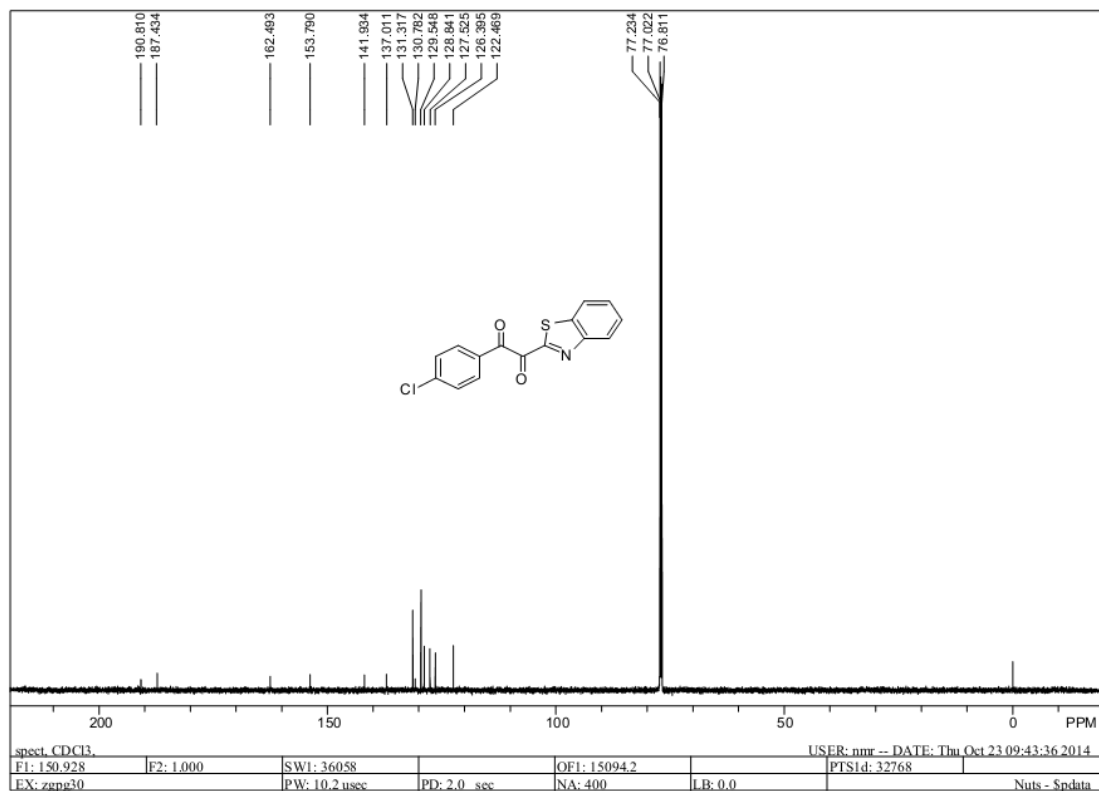

$^1\text{H}$  and  $^{13}\text{C}$  NMR spectra of **3g**

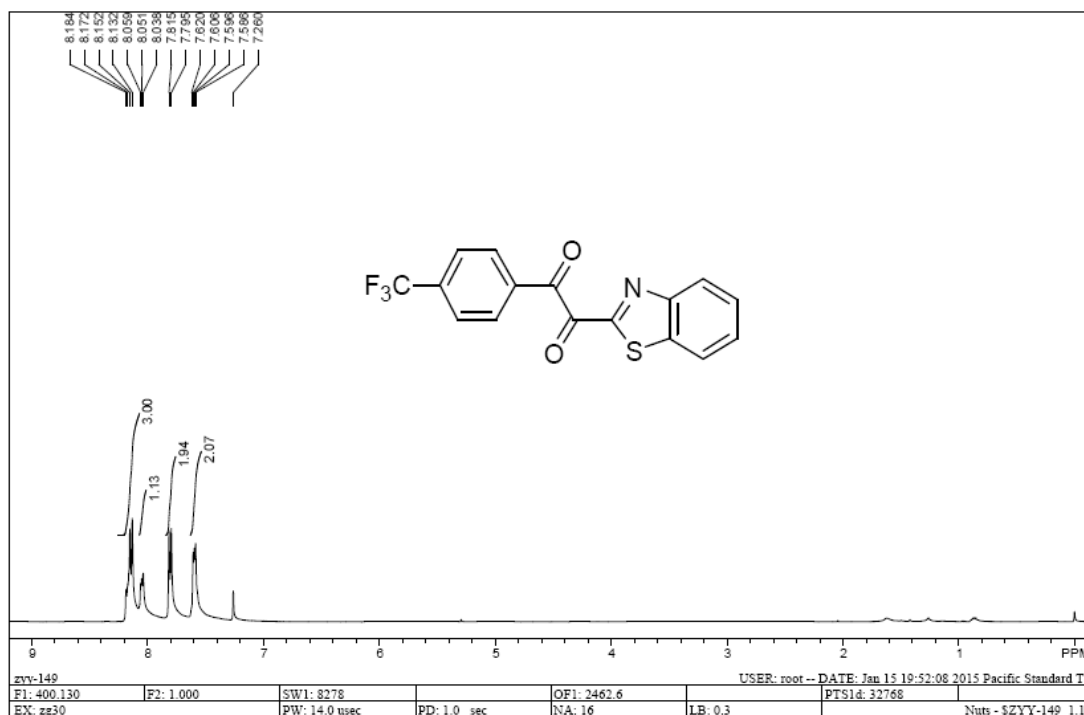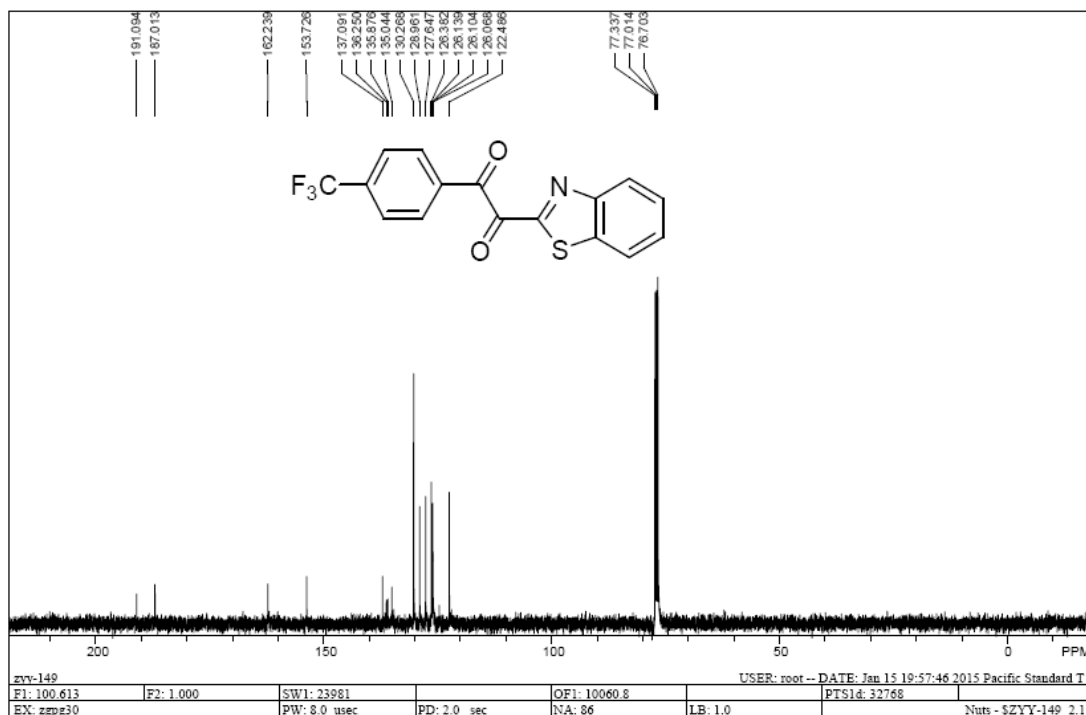

$^1\text{H}$  and  $^{13}\text{C}$  NMR spectra of **3h**

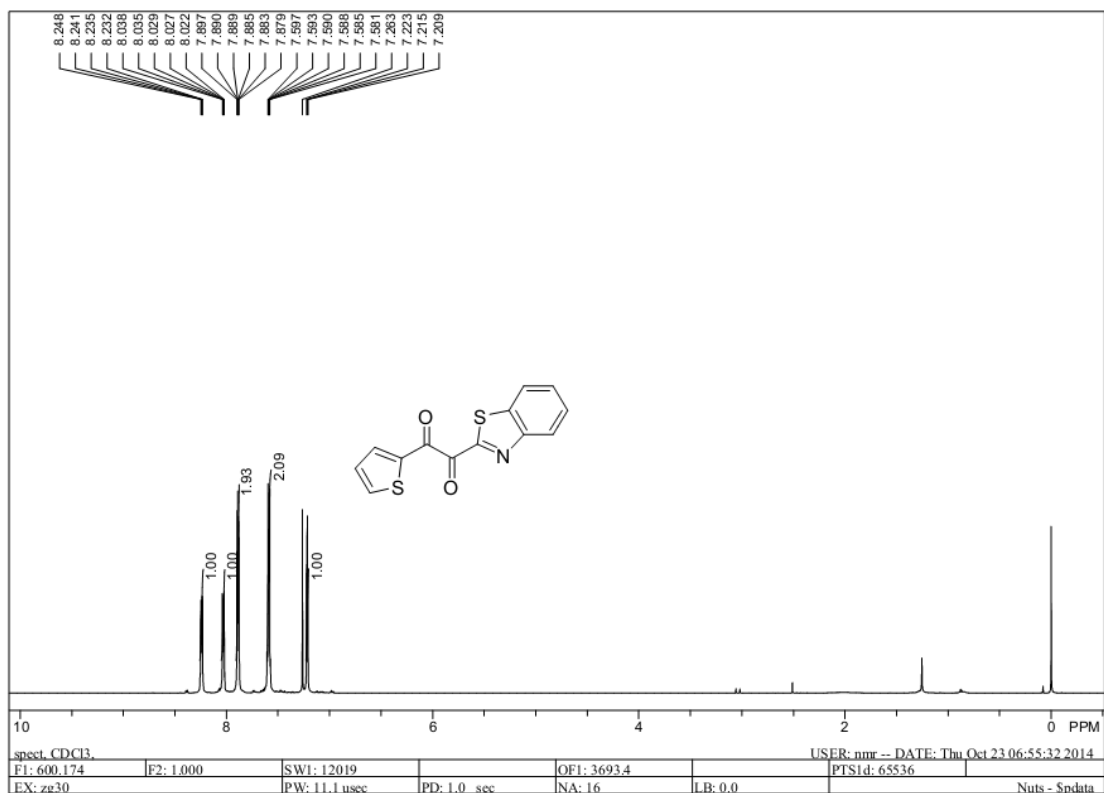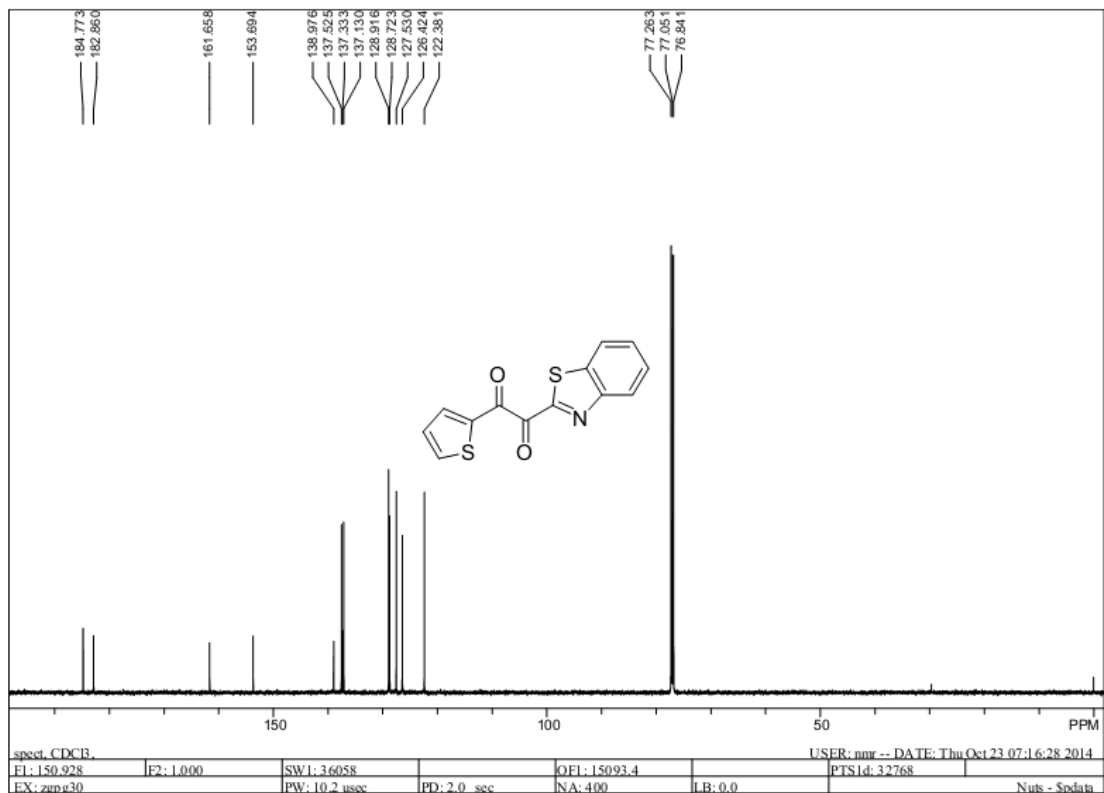

$^1\text{H}$  and  $^{13}\text{C}$  NMR spectra of **3i**

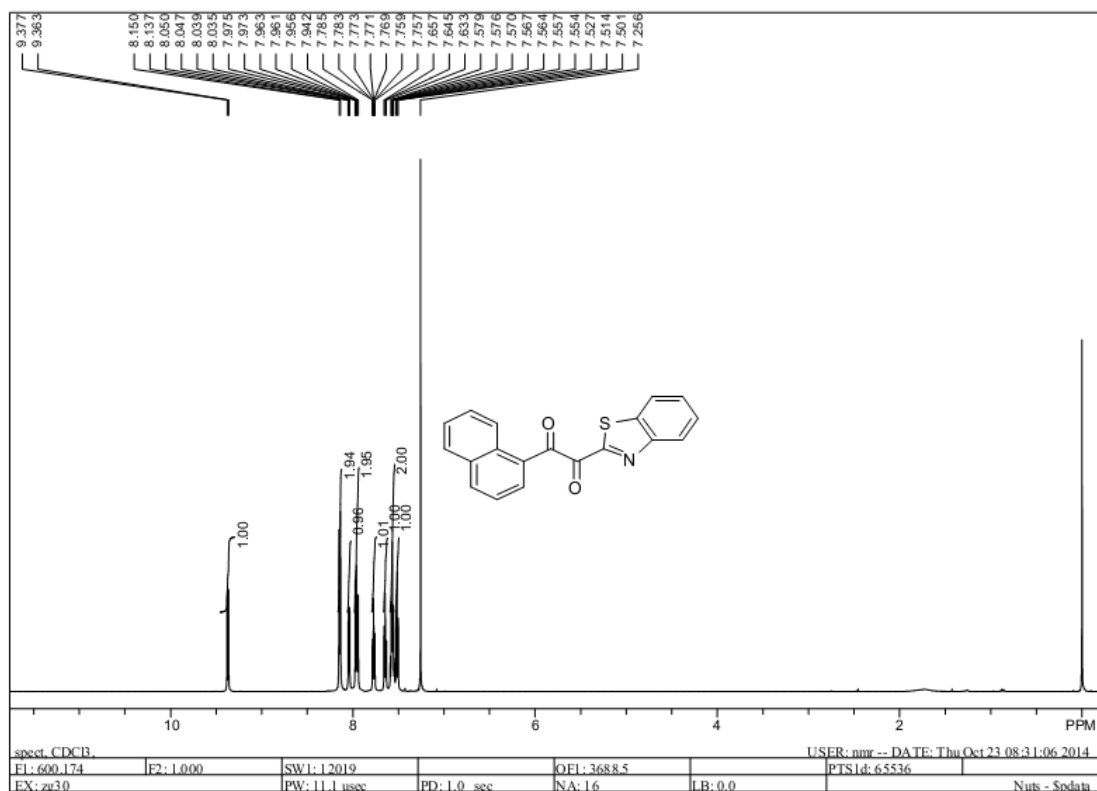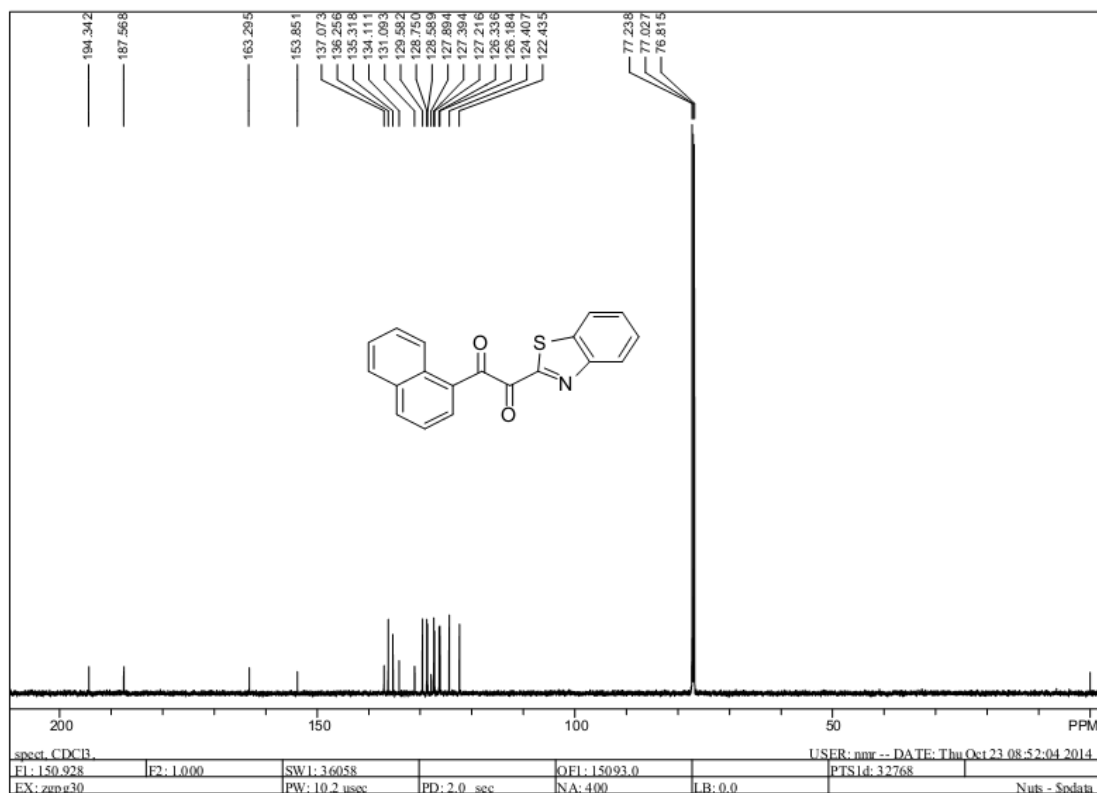

$^1\text{H}$  and  $^{13}\text{C}$  NMR spectra of **3j**

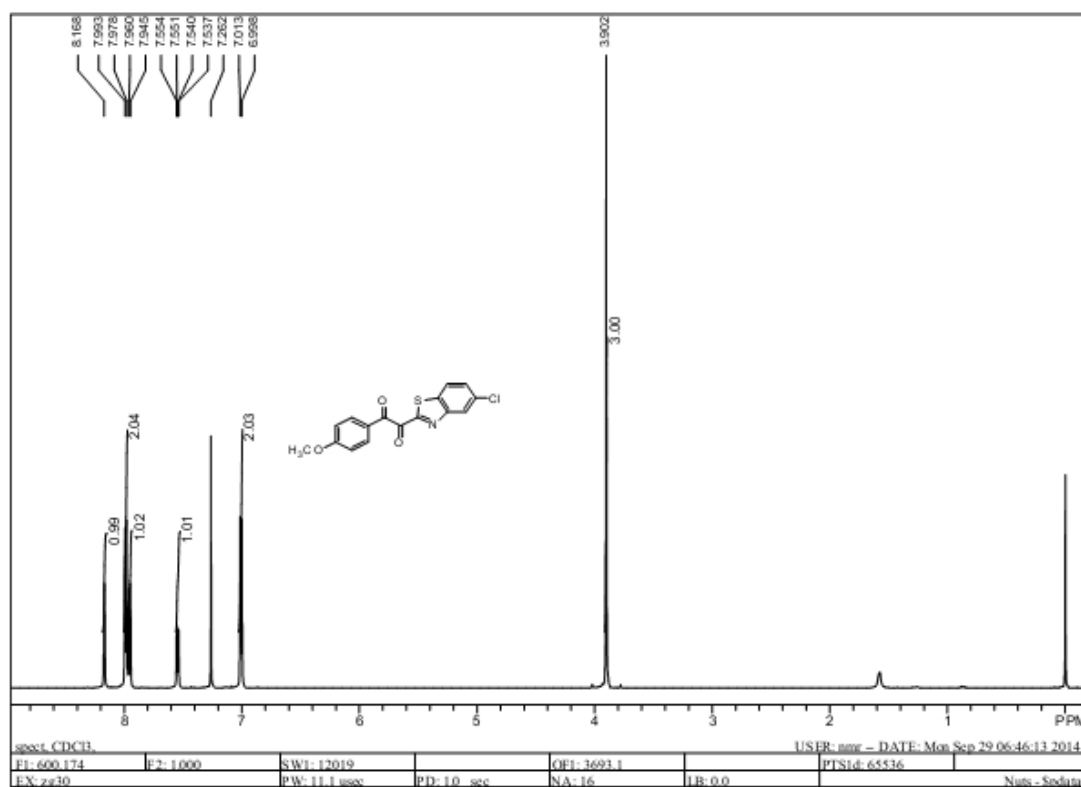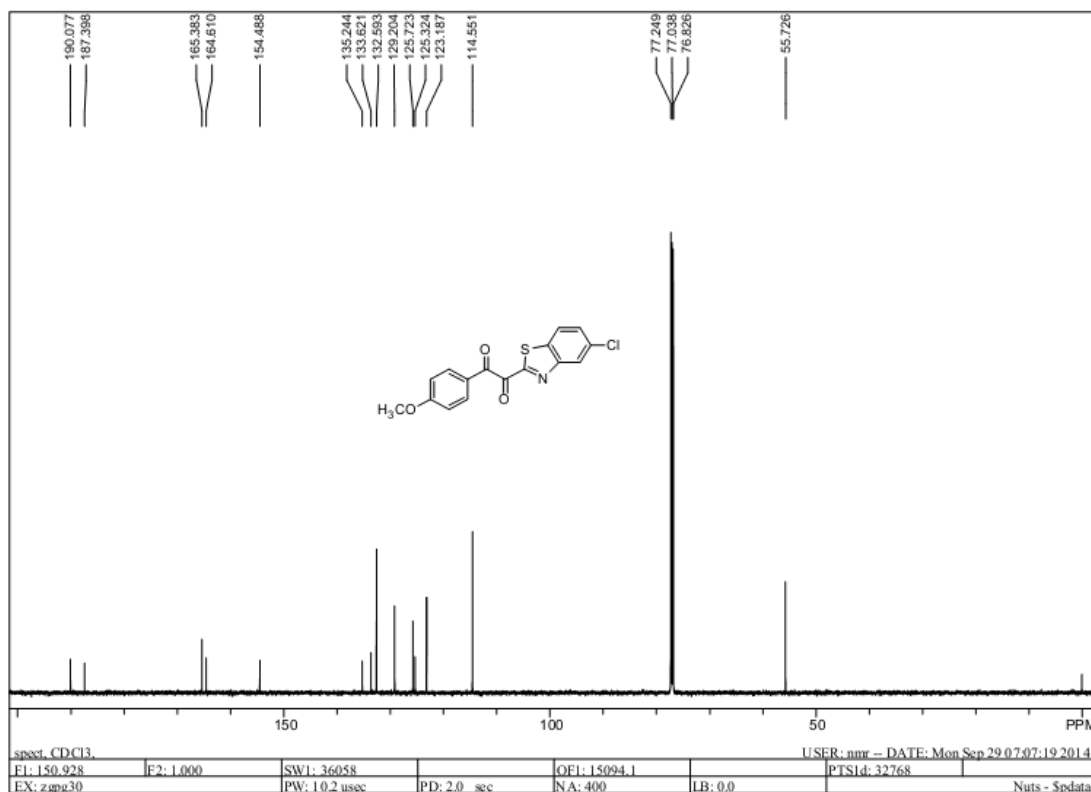

$^1\text{H}$  and  $^{13}\text{C}$  NMR spectra of **3k**

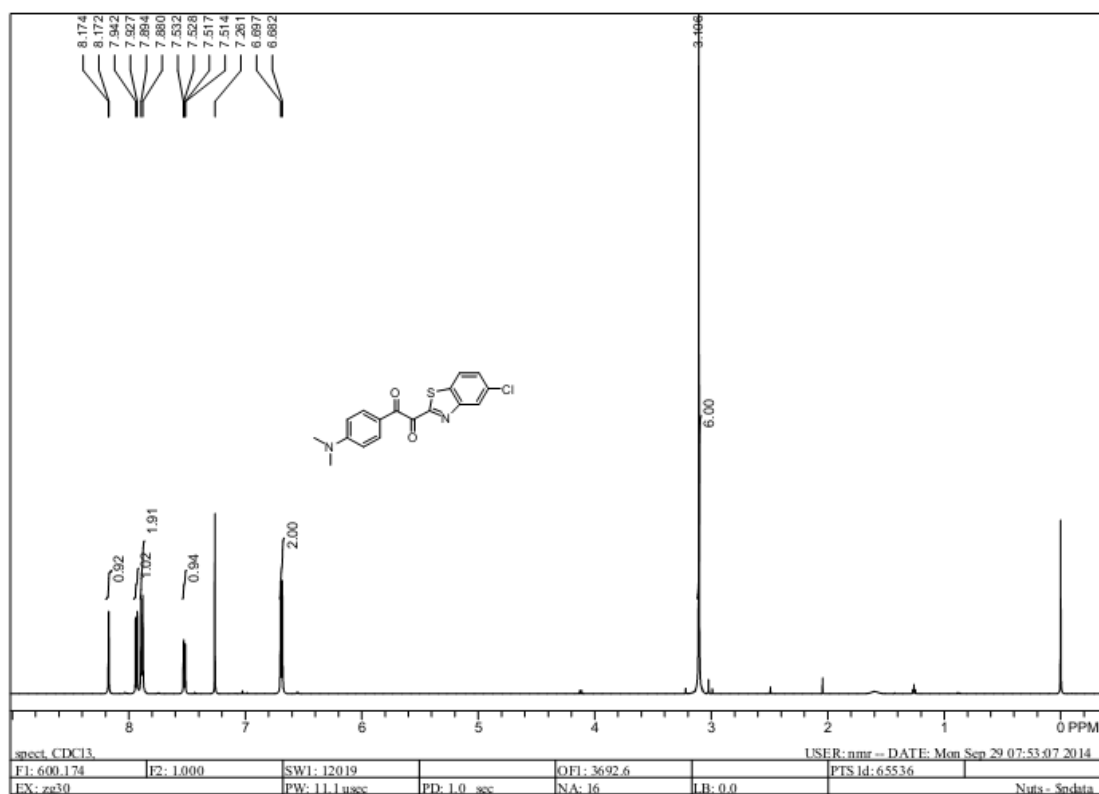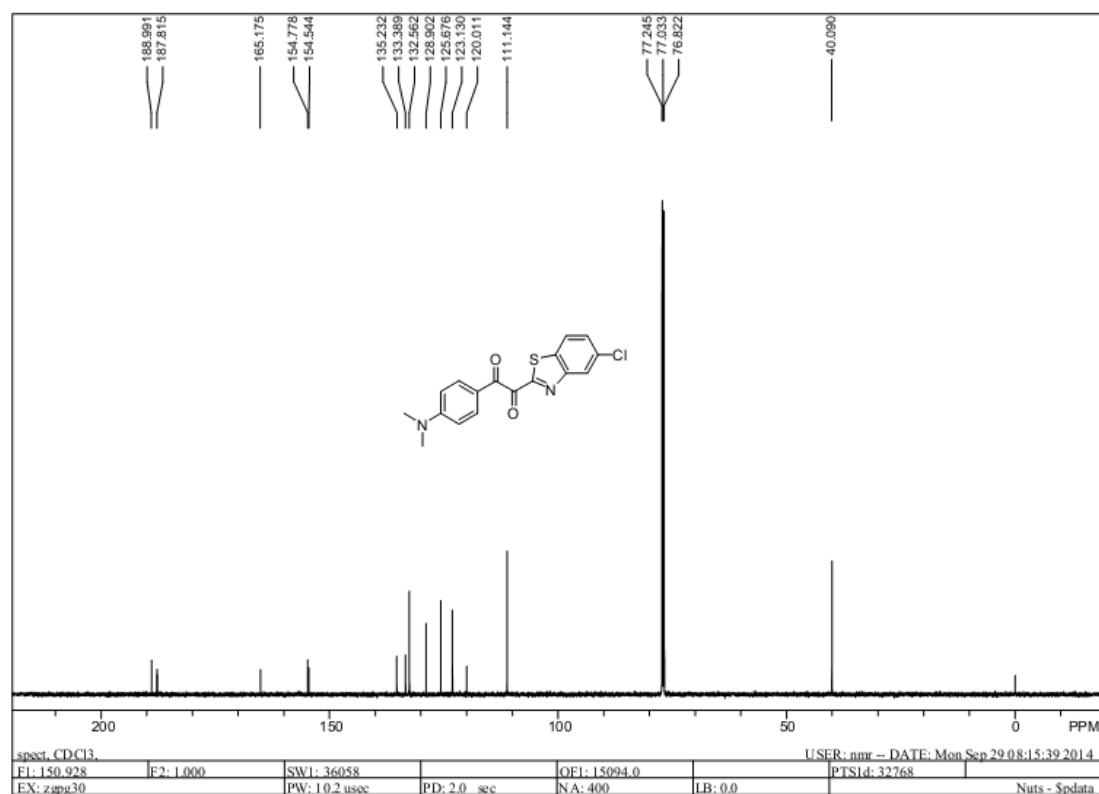

$^1\text{H}$  and  $^{13}\text{C}$  NMR spectra of **31**

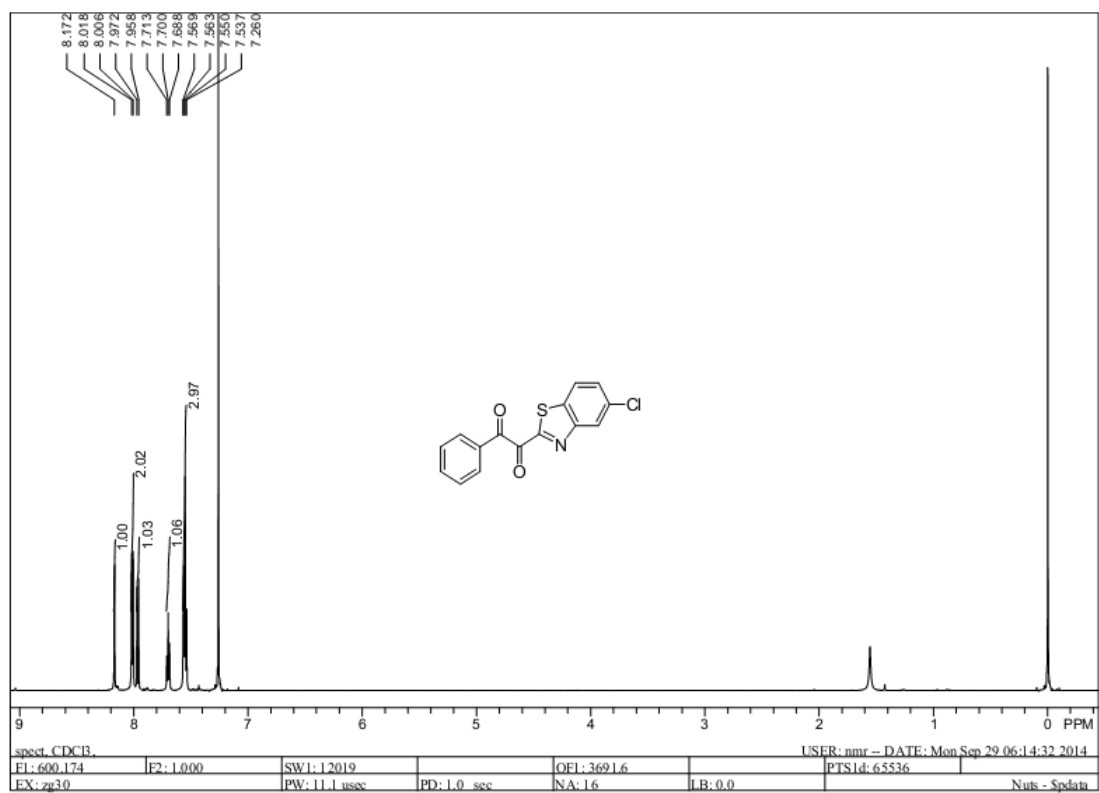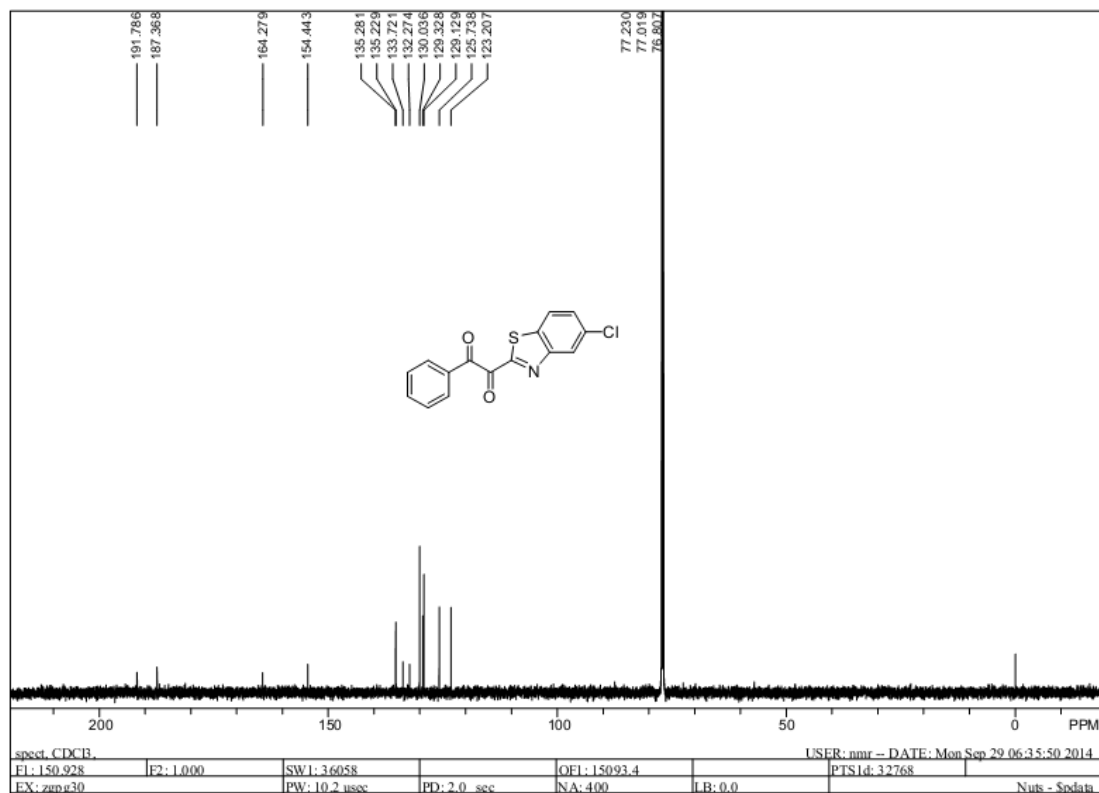



$^1\text{H}$  and  $^{13}\text{C}$  NMR spectra of **3m**

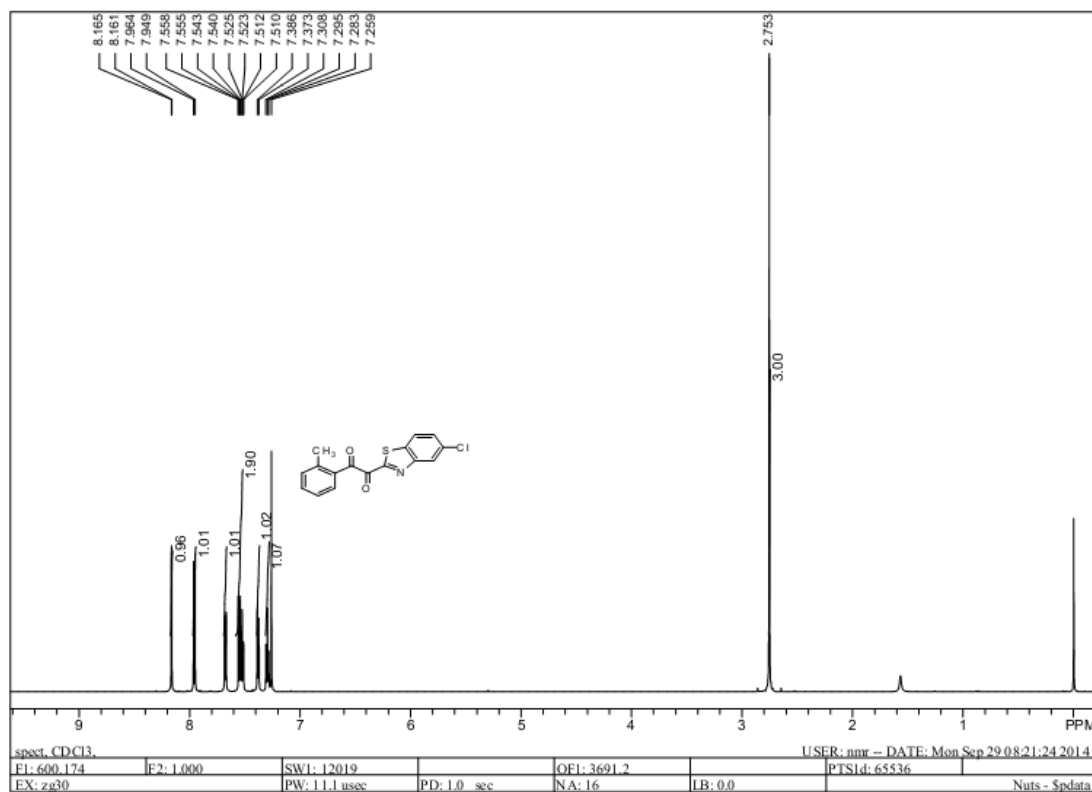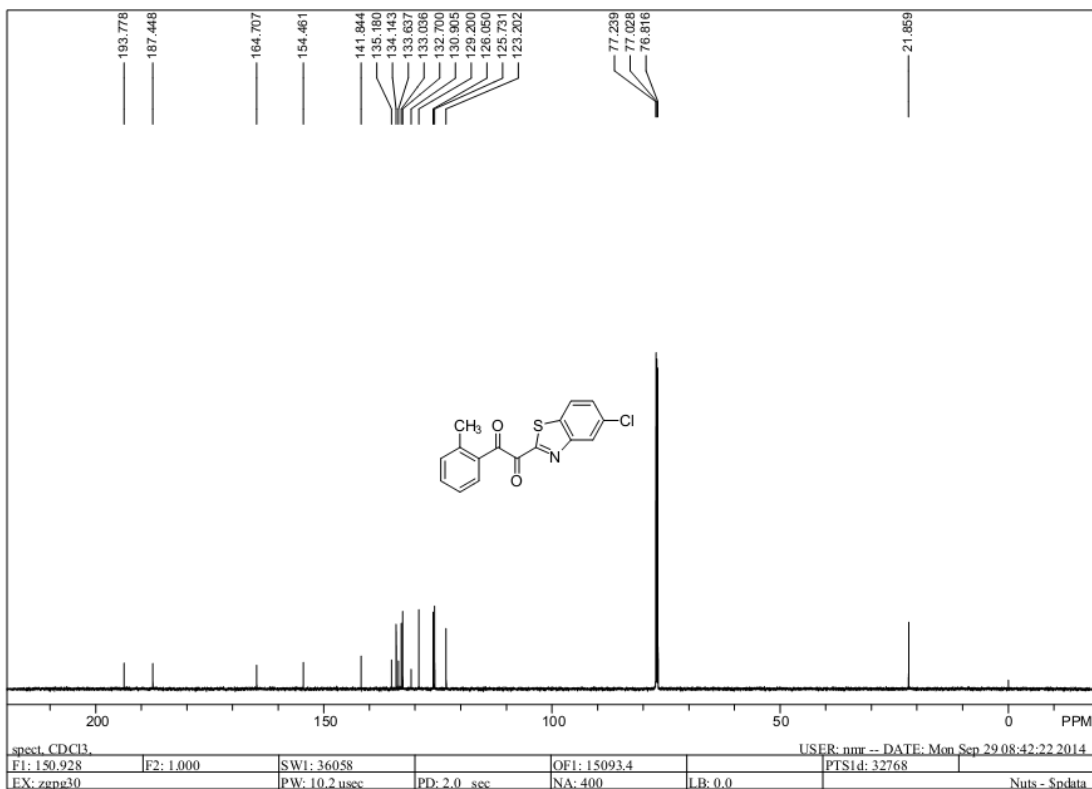

$^1\text{H}$  and  $^{13}\text{C}$  NMR spectra of **3n**

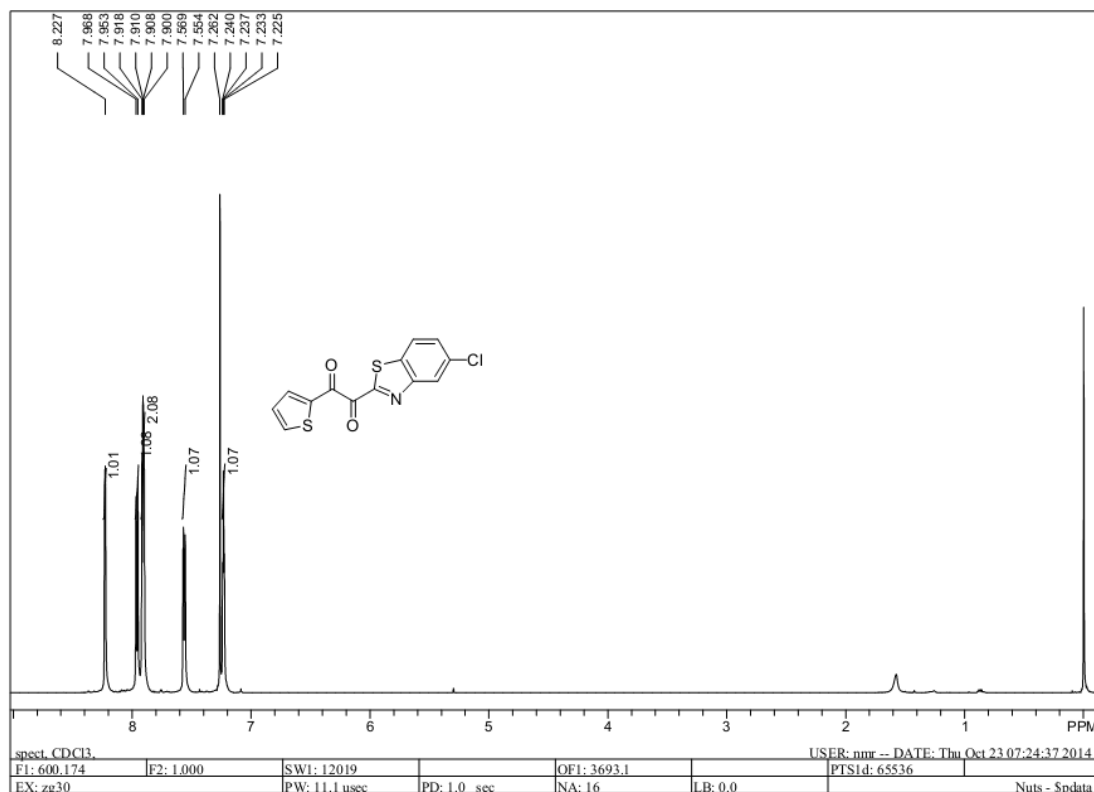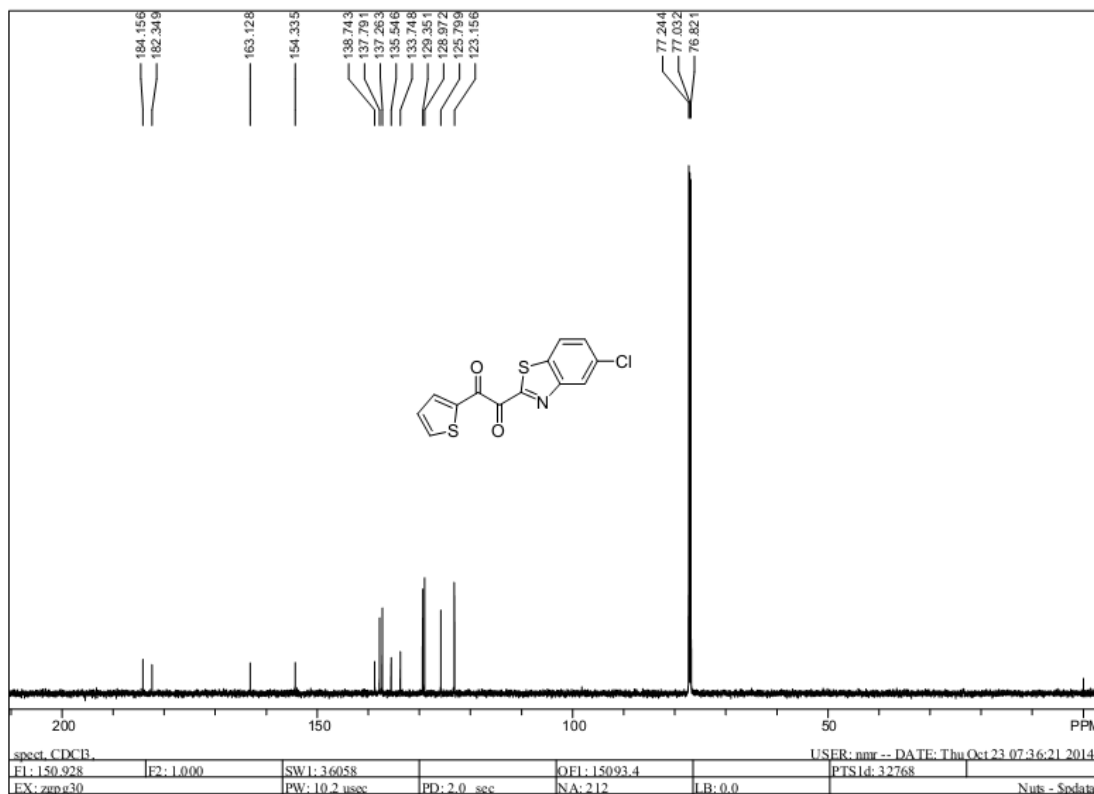

$^1\text{H}$  and  $^{13}\text{C}$  NMR spectra of **3o**

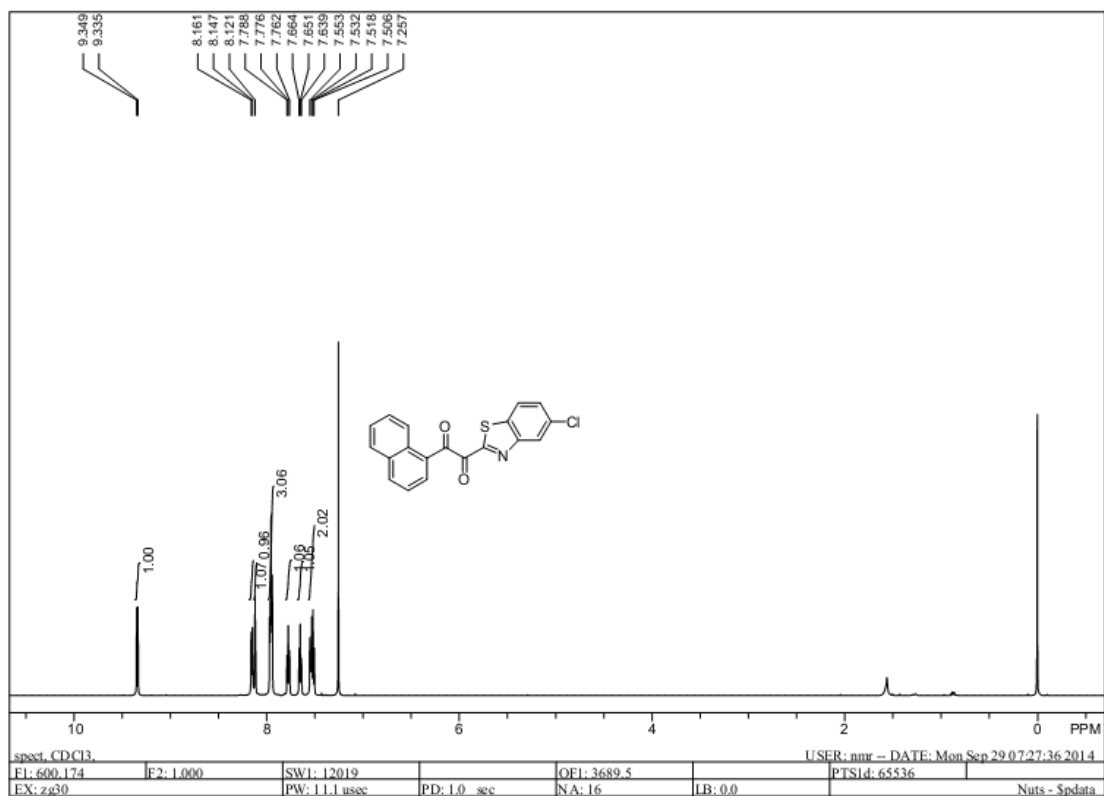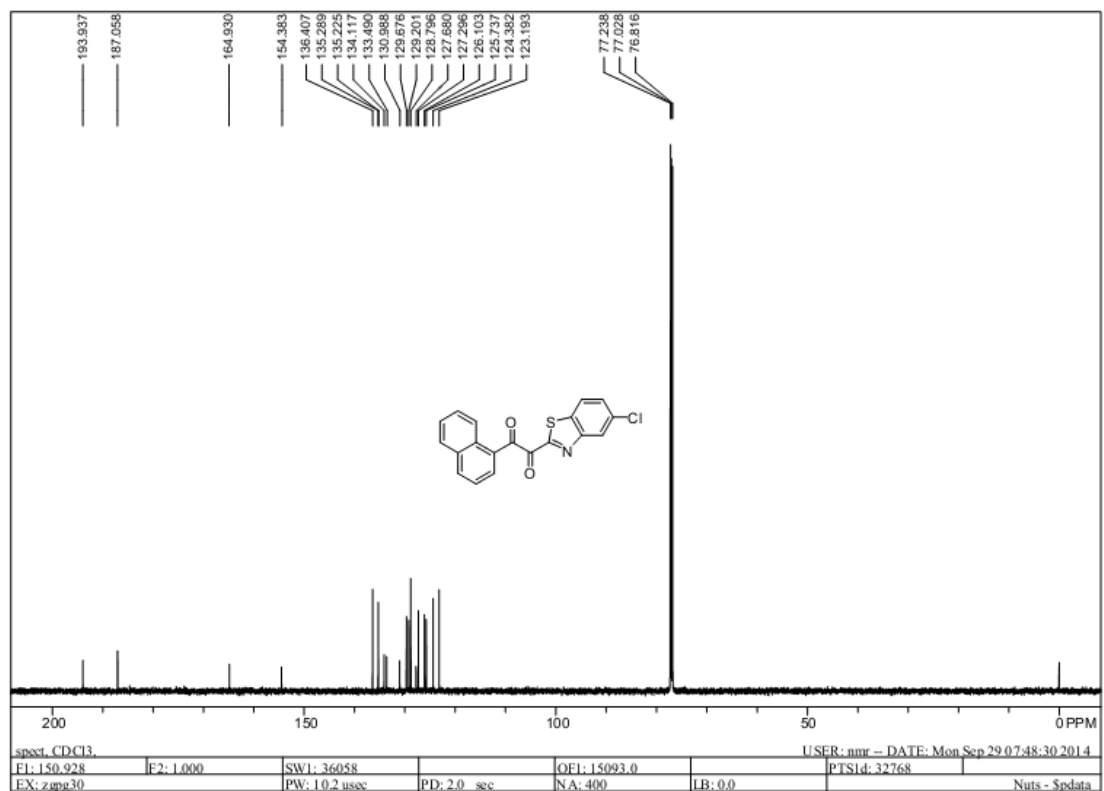

$^1\text{H}$  and  $^{13}\text{C}$  NMR spectra of **3p**

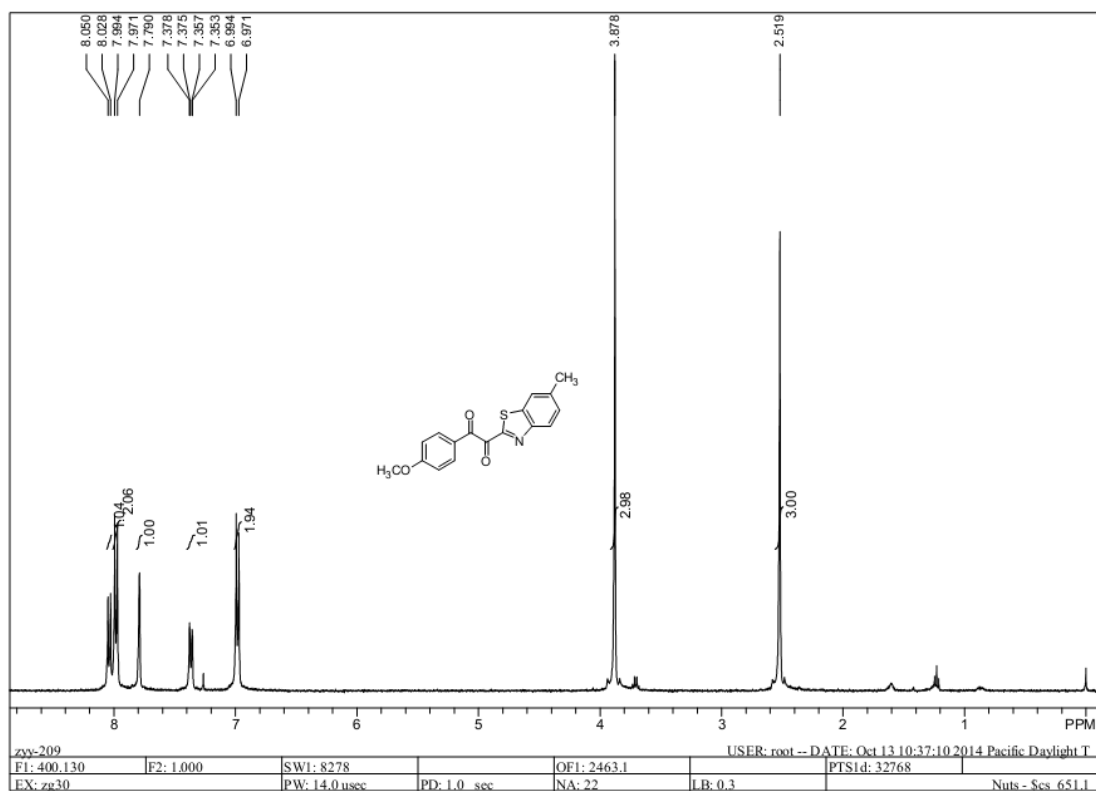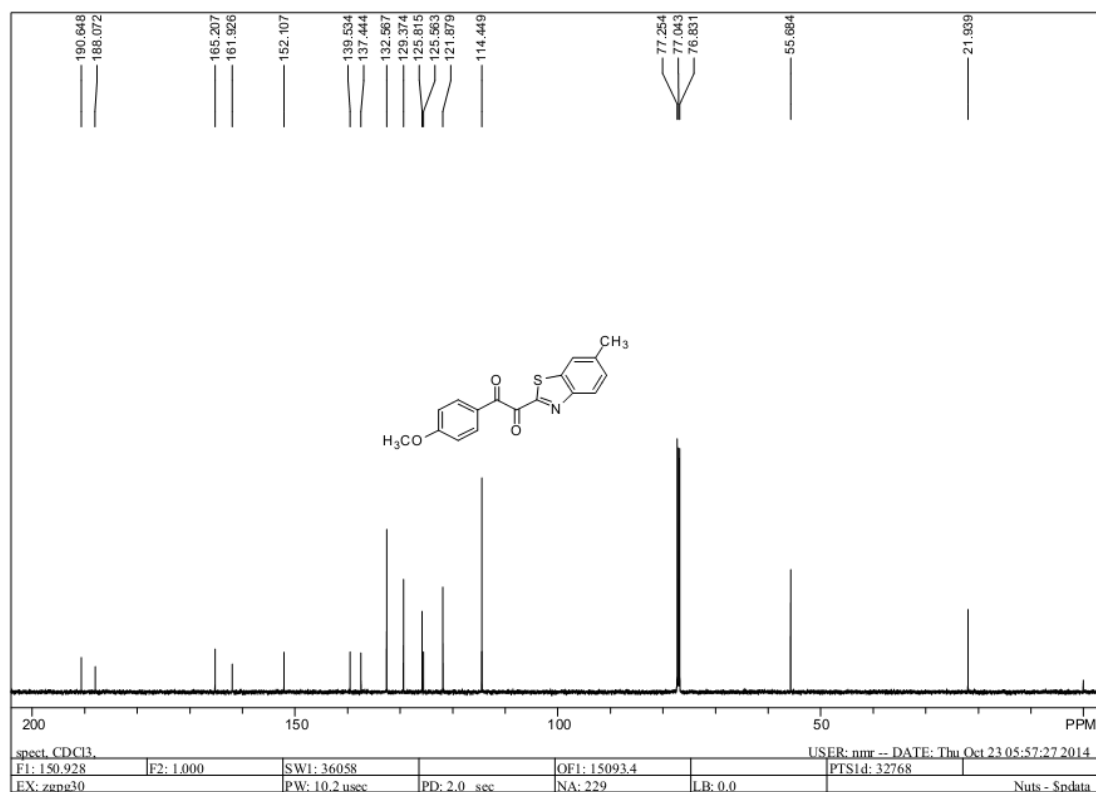

$^1\text{H}$  and  $^{13}\text{C}$  NMR spectra of **3q**

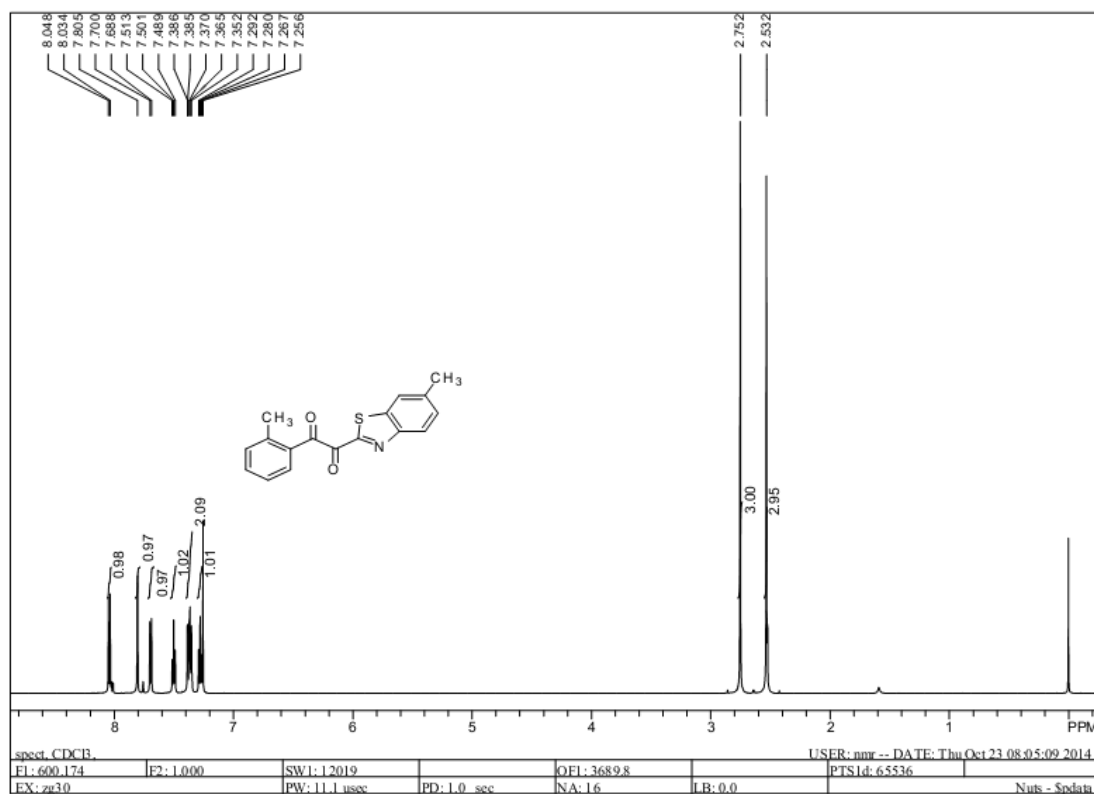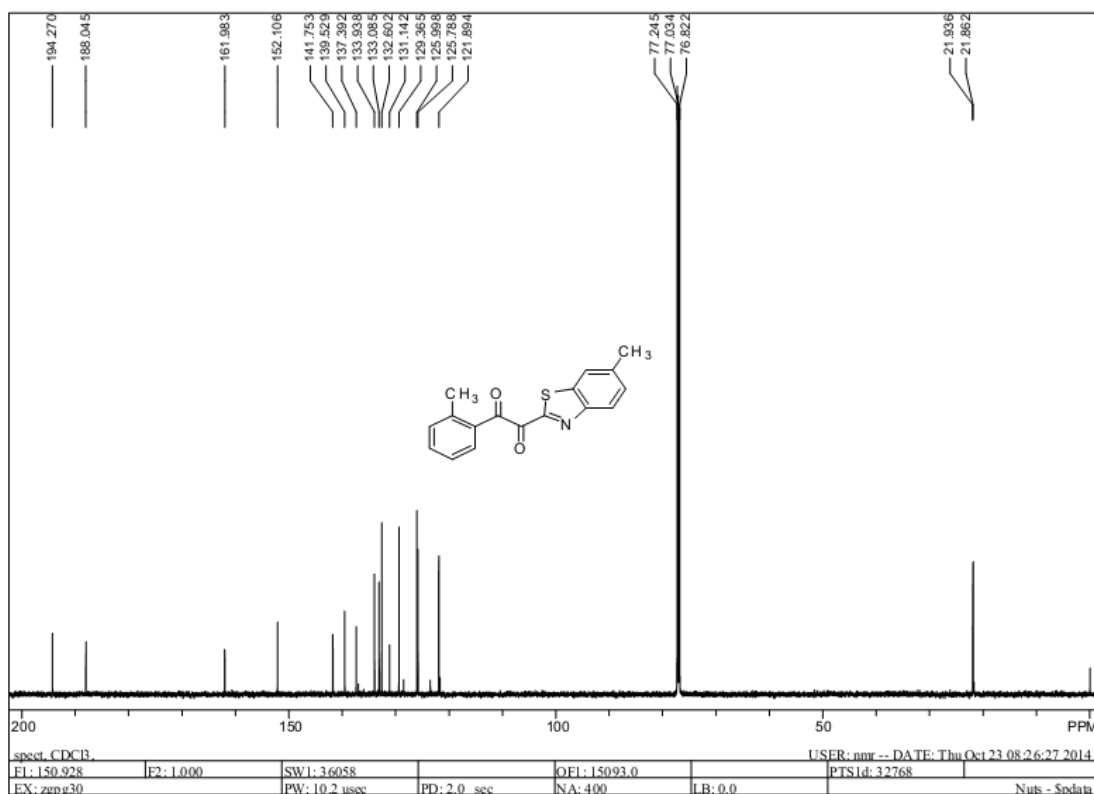

$^1\text{H}$  and  $^{13}\text{C}$  NMR spectra of **3r**

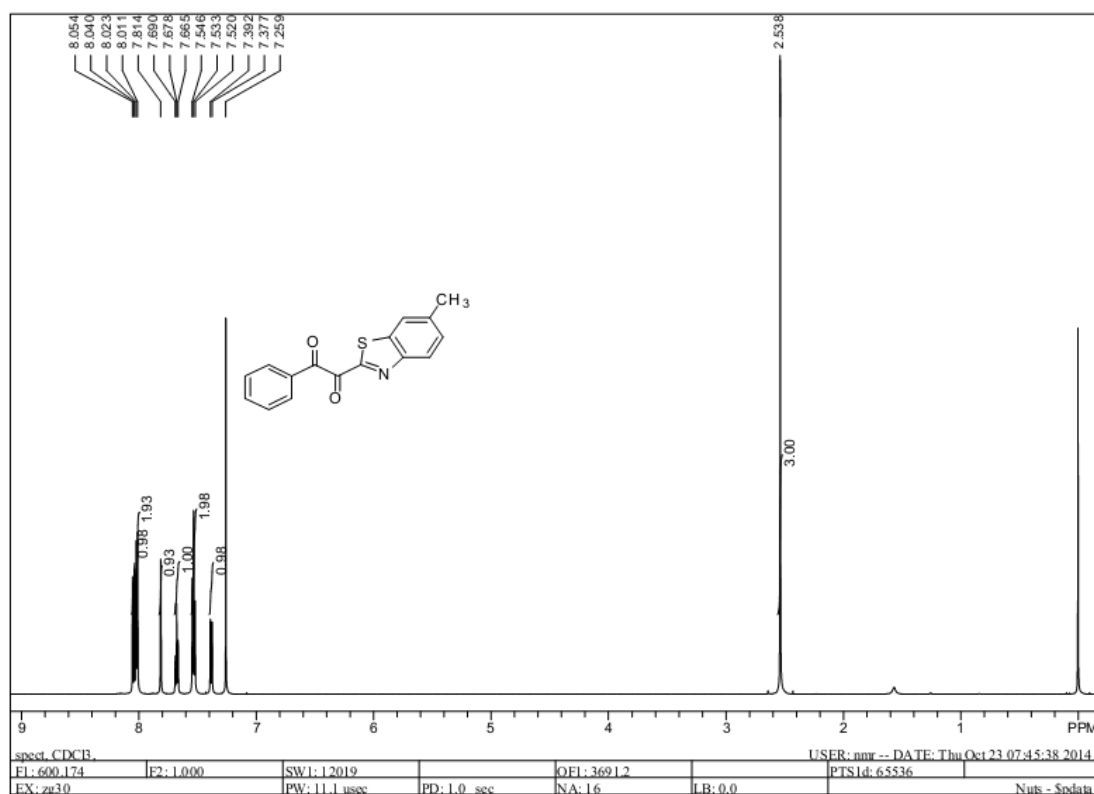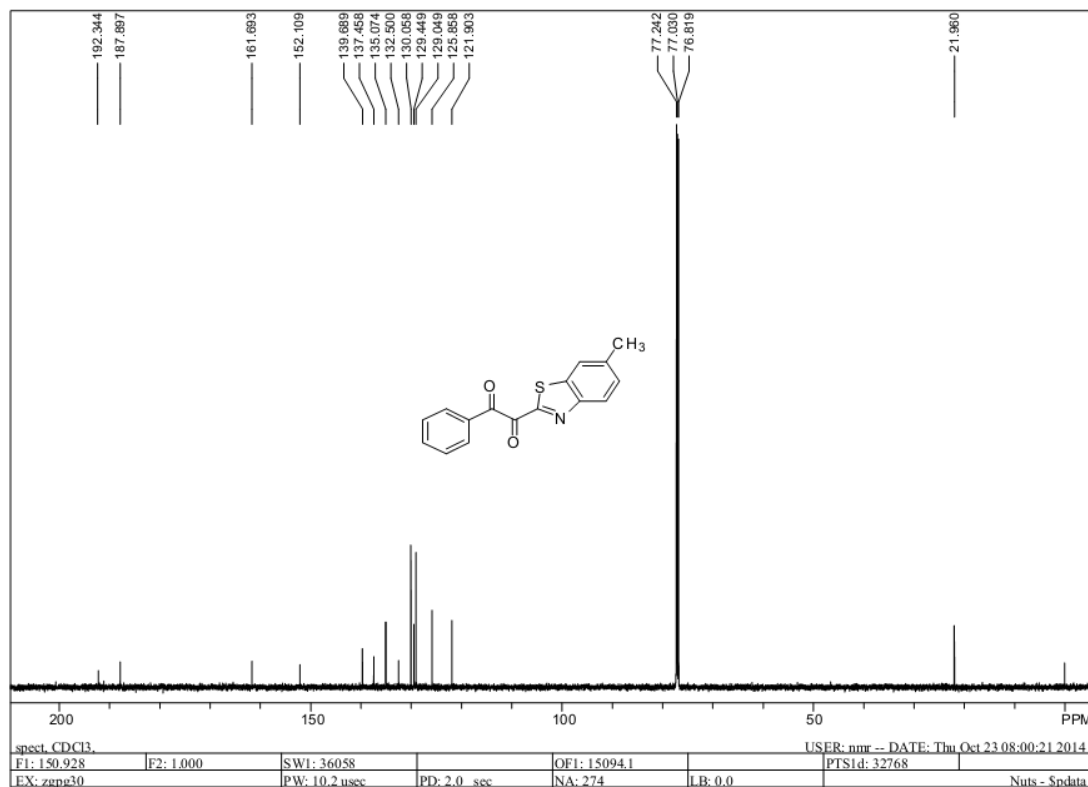

<sup>1</sup>H NMR spectrum of **4a** (Known compound)

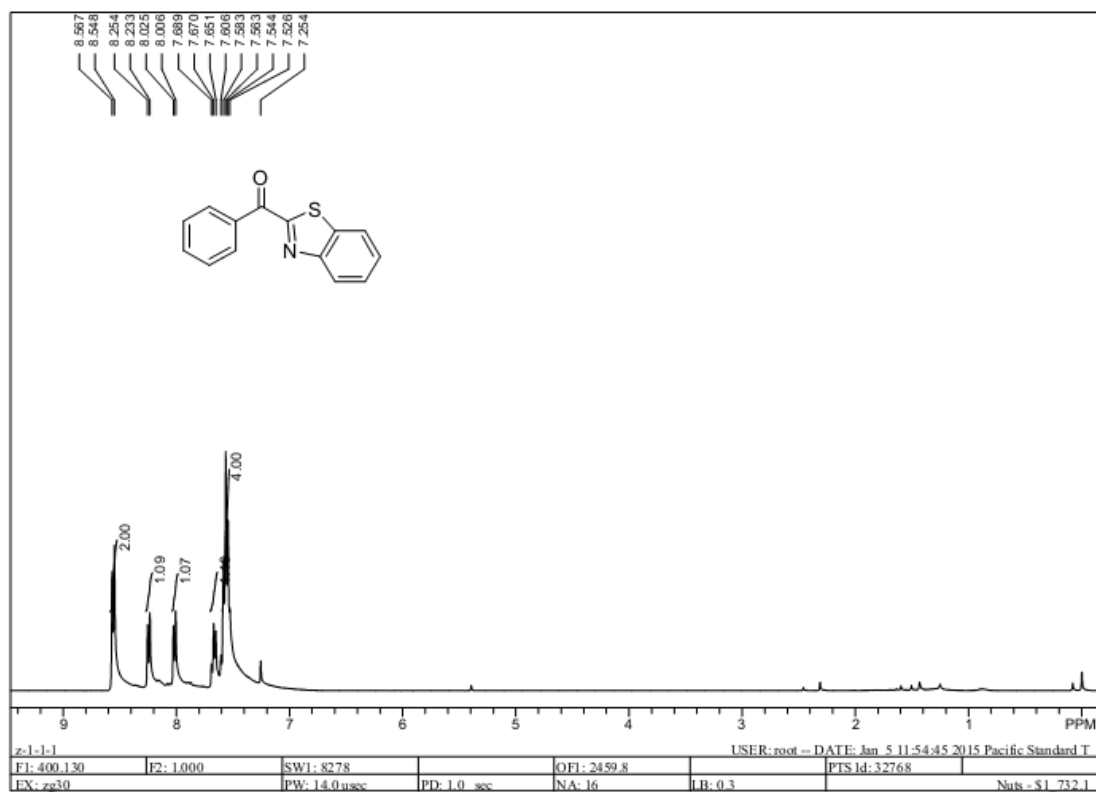

<sup>1</sup>H NMR spectrum of **4b** (Known compound)

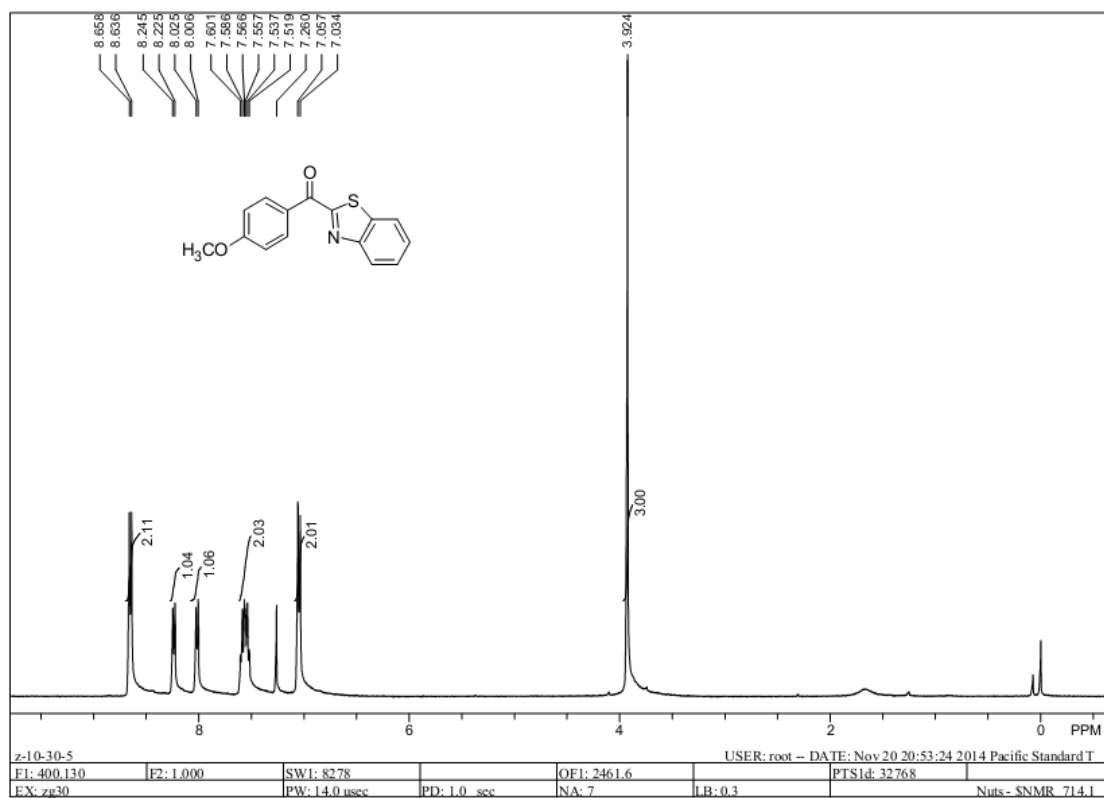

<sup>1</sup>H NMR spectrum of **4c** (Known compound)

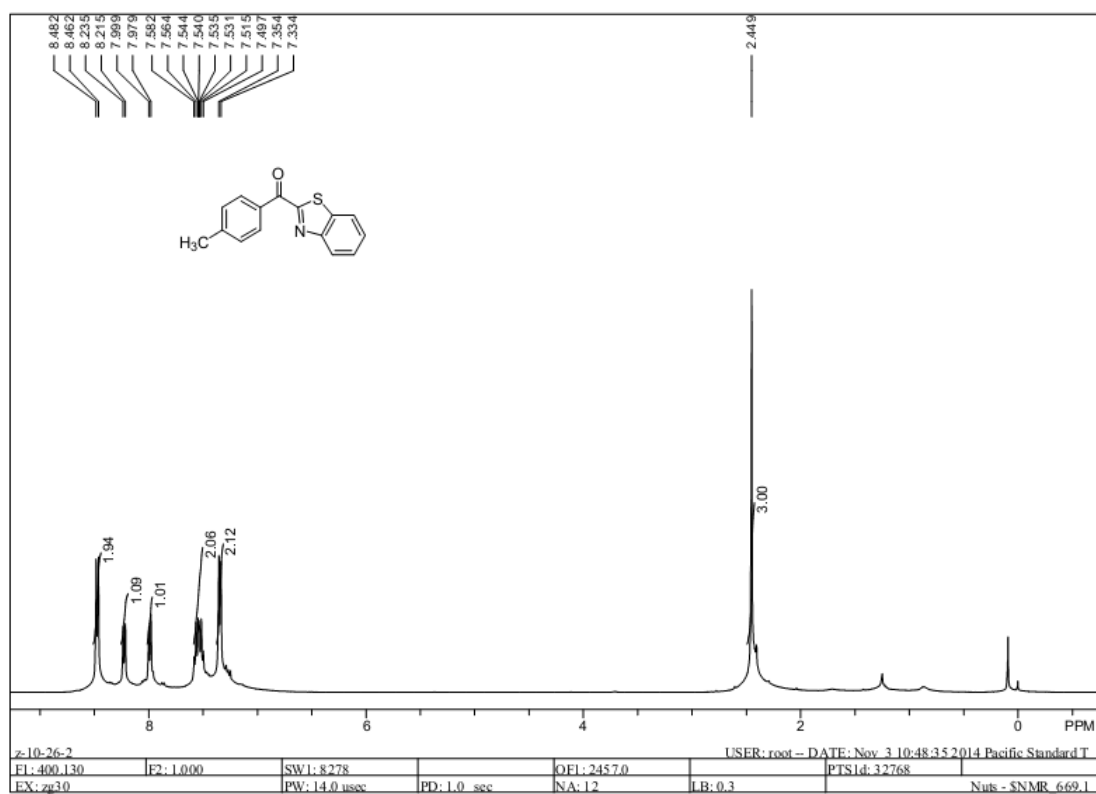

<sup>1</sup>H NMR spectrum of **4d** (Known compound)

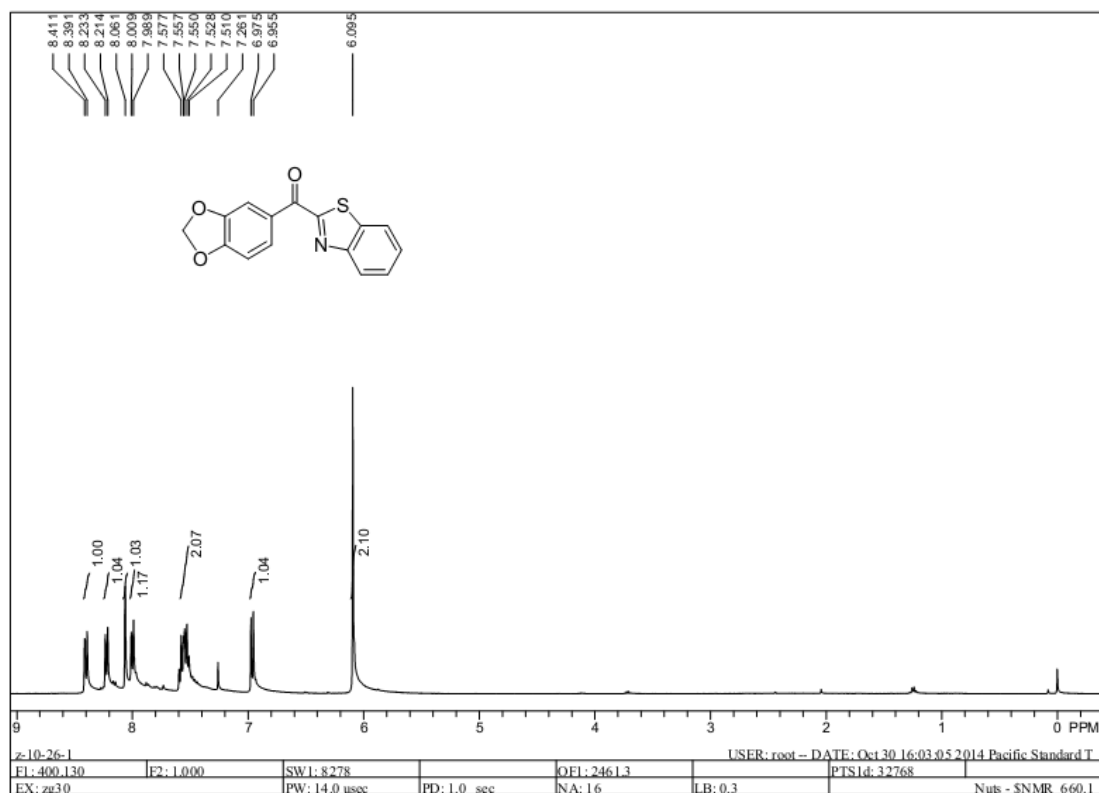



<sup>1</sup>H NMR spectrum of **4e** (Known compound)

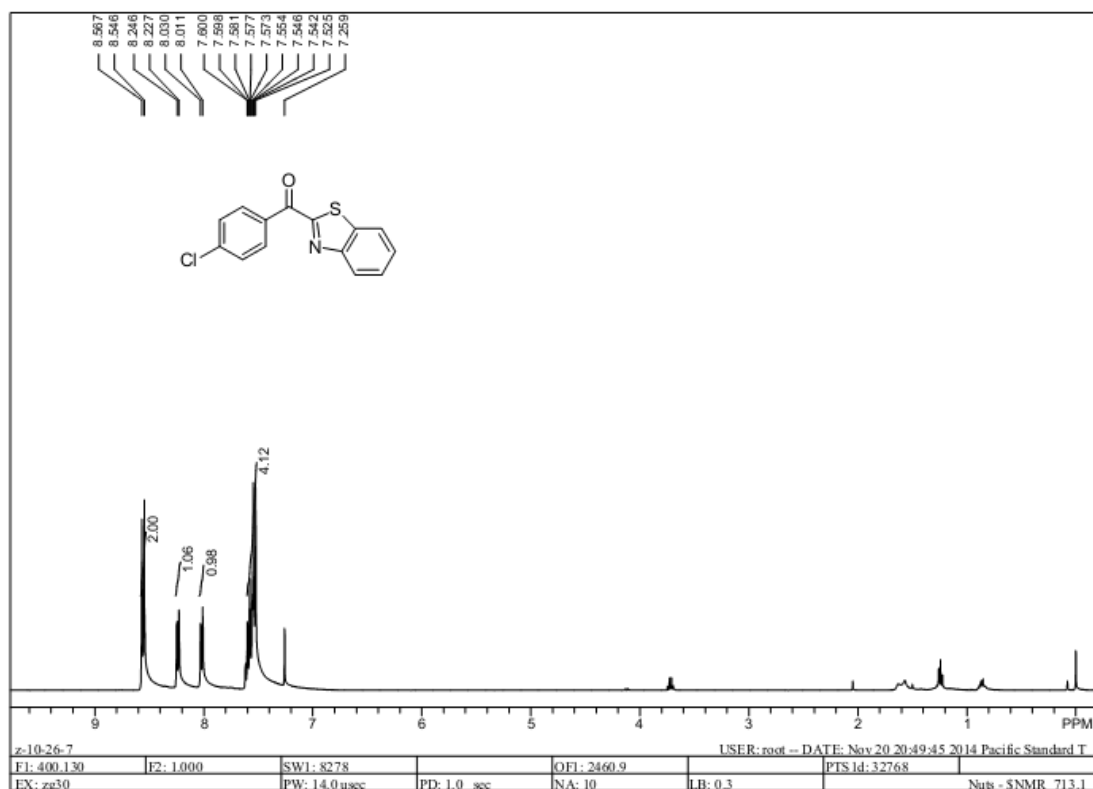

<sup>1</sup>H NMR spectrum of **4f** (Known compound)

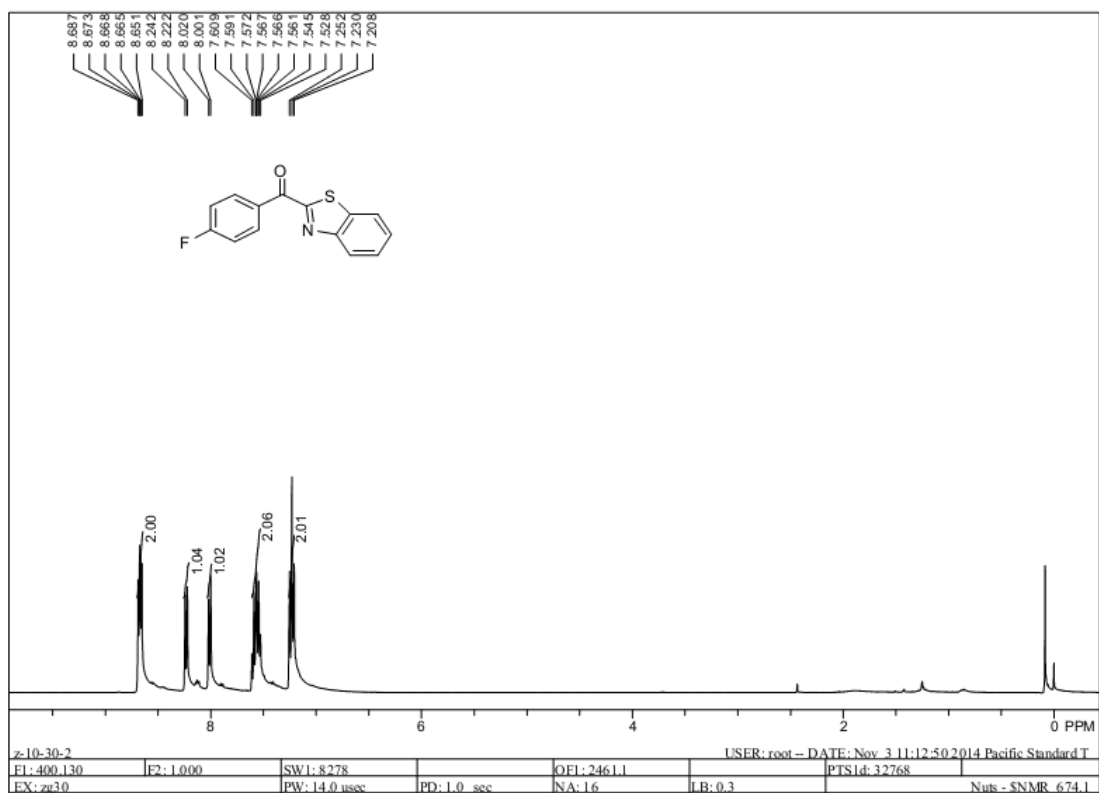

$^1\text{H}$  and  $^{13}\text{C}$  NMR spectra of **4g**

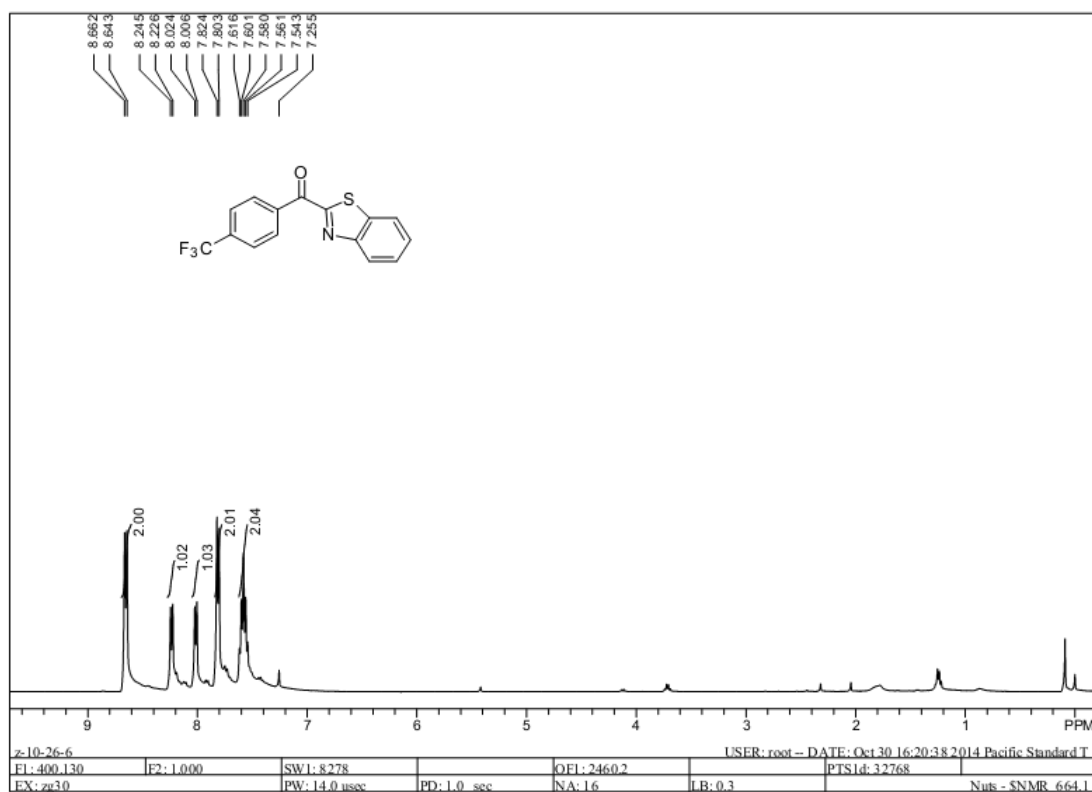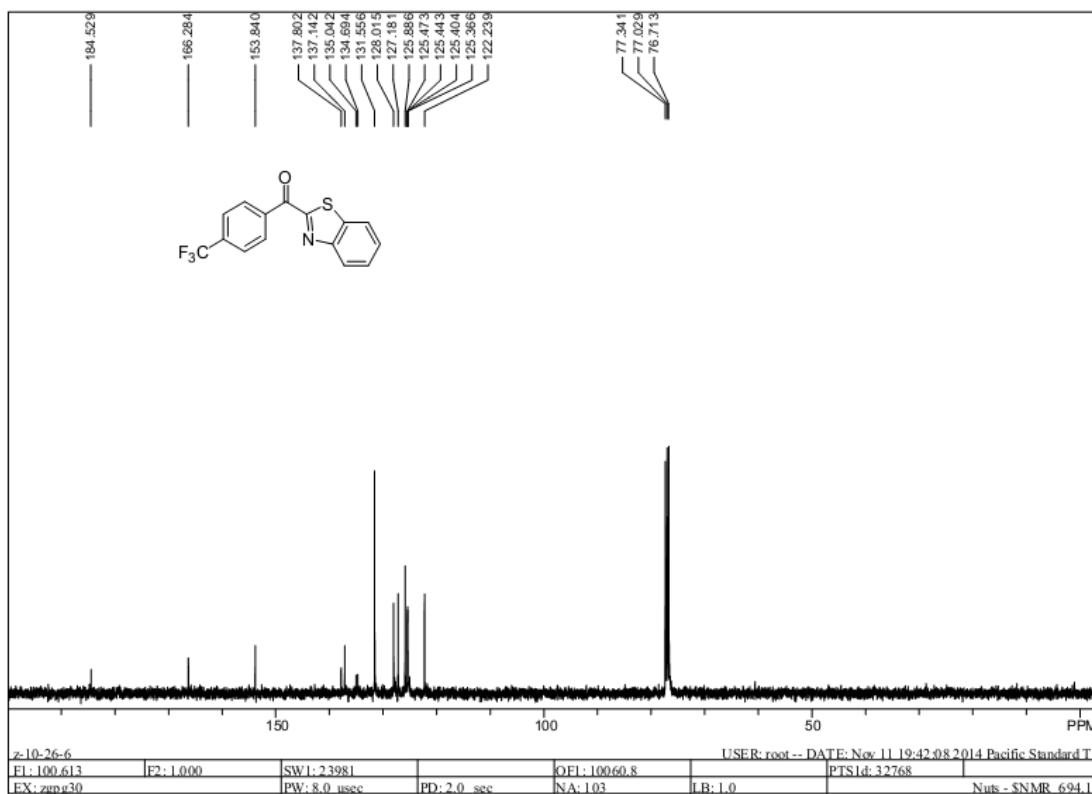

$^1\text{H}$  and  $^{13}\text{C}$  NMR spectra of **4h**

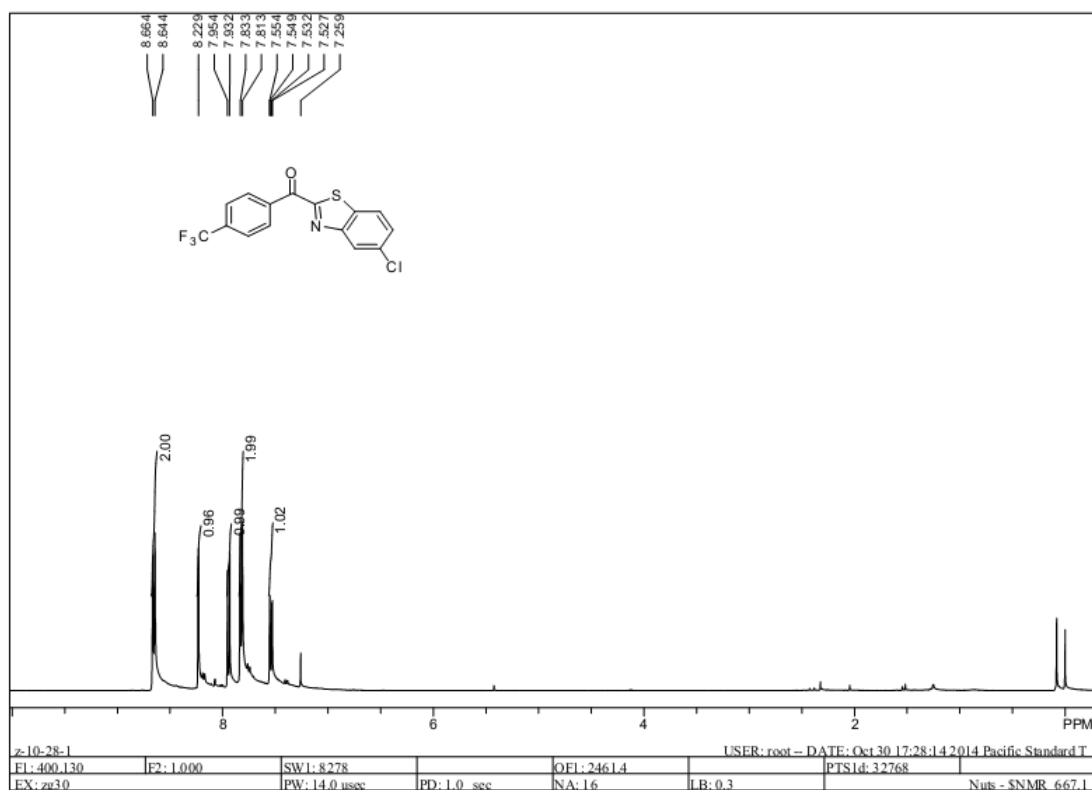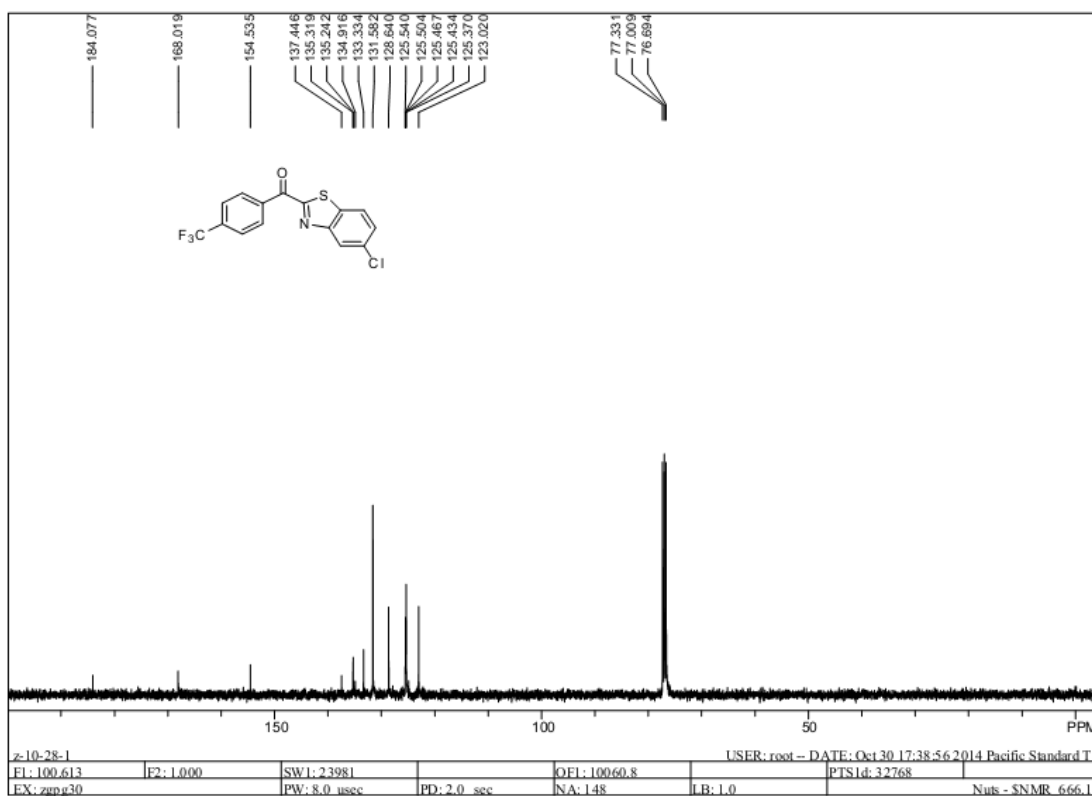

<sup>1</sup>H NMR spectrum of **4i** (Known compound)

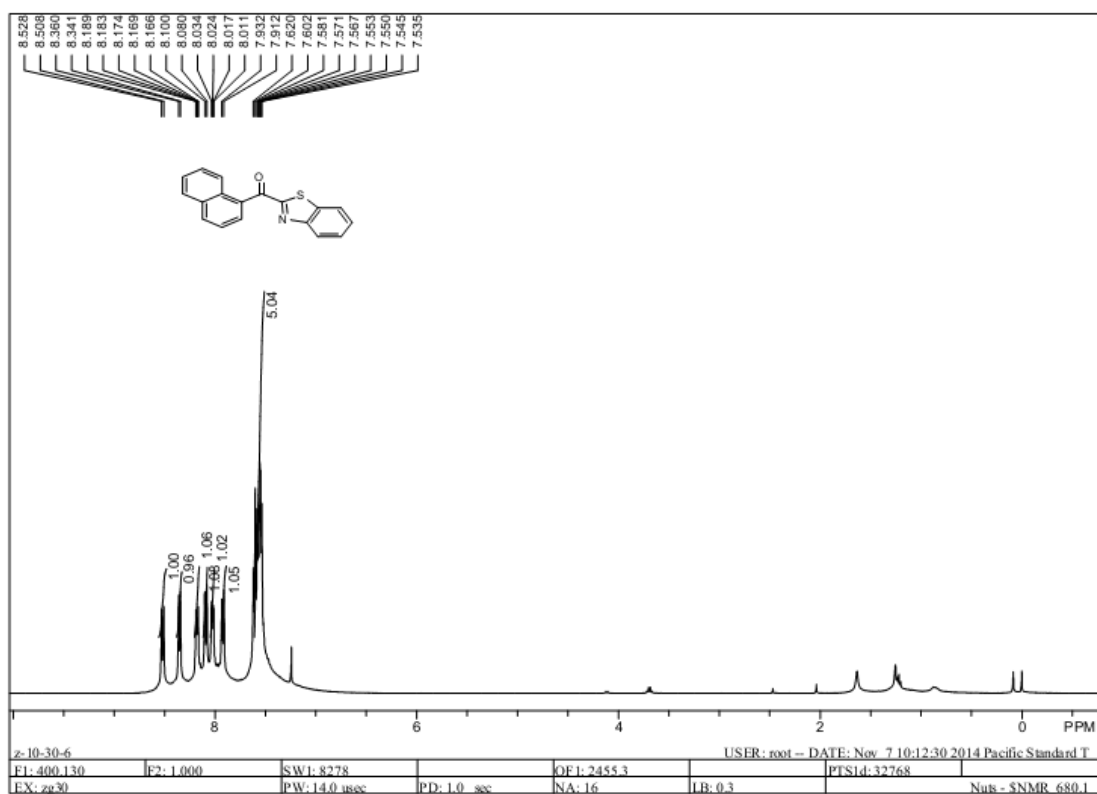

<sup>1</sup>H NMR spectrum of **4j** (Known compound)

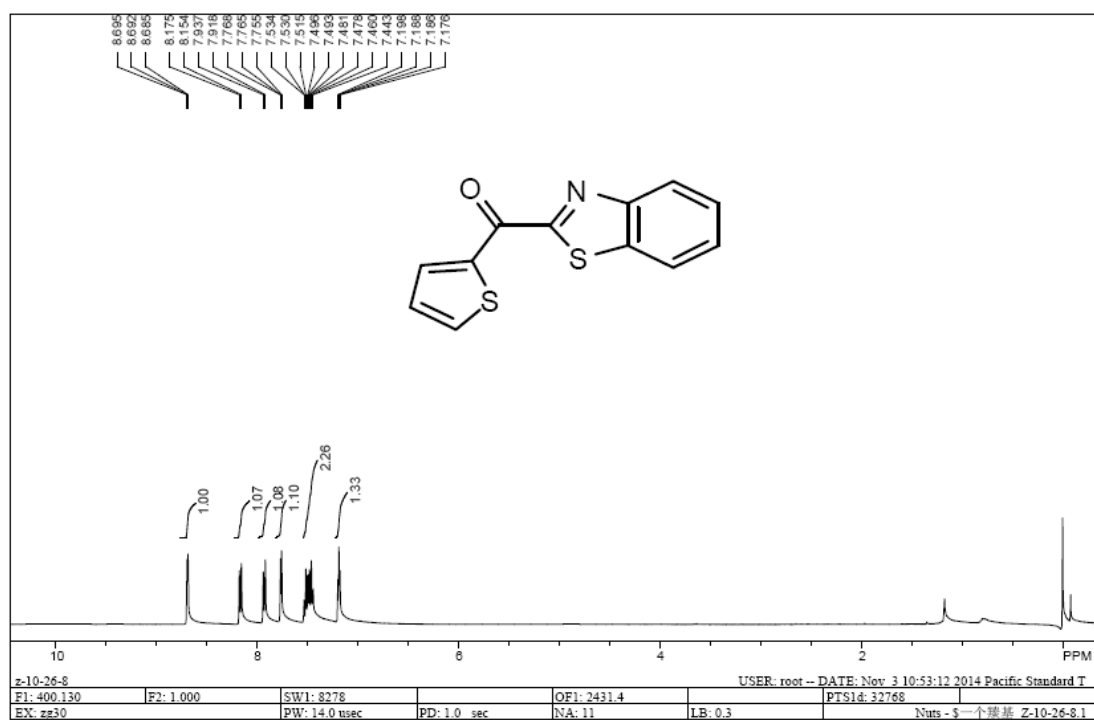

Crystal structure of **3i**

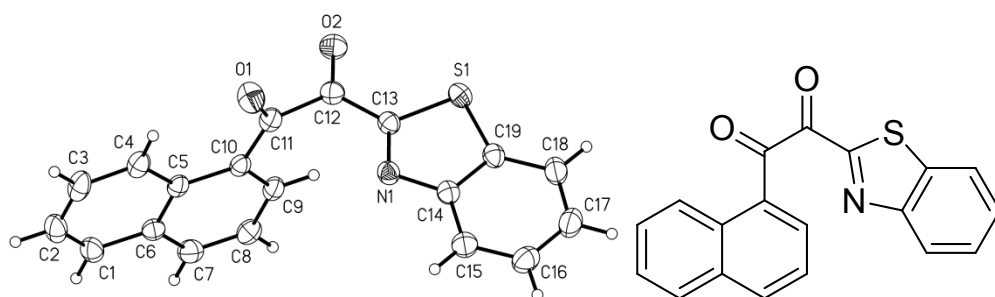

Supplement: c5gc01821h1.pdf [file c5gc01821h1.pdf]
